1 **A fluorescent sensor for spatiotemporally resolved endocannabinoid dynamics *in***  
2 ***vitro* and *in vivo***

3

4 Ao Dong<sup>1,2,3</sup>, Kaikai He<sup>1,2</sup>, Barna Dudok<sup>4</sup>, Jordan S Farrell<sup>4</sup>, Wuqiang Guan<sup>5</sup>, Daniel J  
5 Liput<sup>6,7</sup>, Henry L Puhl<sup>7</sup>, Ruyi Cai<sup>1,2</sup>, Jiali Duan<sup>1,2</sup>, Eddy Albarran<sup>8</sup>, Jun Ding<sup>9</sup>, David M  
6 Lovinger<sup>6</sup>, Bo Li<sup>5</sup>, Ivan Soltesz<sup>4</sup>, & Yulong Li<sup>1,2,3,10,\*</sup>

7

8 <sup>1</sup>State Key Laboratory of Membrane Biology, Peking University School of Life Sciences,  
9 Beijing, China;

10 <sup>2</sup>PKU-IDG/McGovern Institute for Brain Research, Beijing, China;

11 <sup>3</sup>Peking-Tsinghua Center for Life Sciences, Academy for Advanced Interdisciplinary  
12 Studies, Peking University, Beijing, China;

13 <sup>4</sup>Department of Neurosurgery, Stanford University, Palo Alto, CA, USA;

14 <sup>5</sup>Cold Spring Harbor Laboratory, Cold Spring Harbor, NY, USA;

15 <sup>6</sup>Laboratory for Integrative Neuroscience, National Institute on Alcohol Abuse and  
16 Alcoholism, Bethesda, MD, USA;

17 <sup>7</sup>Laboratory of Molecular Physiology, National Institute on Alcohol Abuse and Alcoholism,  
18 Bethesda, MD, USA;

19 <sup>8</sup>Neuroscience PhD Program, Stanford University, Palo Alto, CA, USA;

20 <sup>9</sup>Department of Neurosurgery, Department of Neurology, Stanford University School of  
21 Medicine, Palo Alto, CA, USA;

22 <sup>10</sup>Chinese Institute for Brain Research, Beijing, China.

23

24 \*Correspondence should be addressed to Y.L. (yulongli@pku.edu.cn).

25

26 **Endocannabinoids (eCBs) are retrograde lipid neuromodulators involved in many**  
27 **physiologically important processes. However, their release and dynamics in the**  
28 **brain remain largely unknown, in part due to lack of probes capable of reporting**  
29 **real-time eCBs with sufficient spatiotemporal resolution. Here, we developed a new**  
30 **G protein-coupled receptor Activation Based eCB sensor GRAB<sub>eCB2.0</sub> using the**  
31 **human CB1 cannabinoid receptor and a circular-permuted EGFP. GRAB<sub>eCB2.0</sub>**  
32 **exhibited proper cell membrane trafficking, ~seconds kinetics, high specificity and**  
33 **robust fluorescence response to eCBs at physiological concentrations. Using**  
34 **GRAB<sub>eCB2.0</sub>, we detected evoked eCB dynamics in both cultured neurons and acute**  
35 **brain slices. Interestingly, we also observed spontaneous compartmental eCB**  
36 **transients that spread ~11  $\mu$ m in cultured neurons, suggesting locally-restricted eCB**  
37 **signaling. By expressing GRAB<sub>eCB2.0</sub> *in vivo*, we readily observed foot-shock elicited**  
38 **and running triggered eCB transients in mouse amygdala and hippocampus,**  
39 **respectively. Lastly, using GRAB<sub>eCB2.0</sub> in an epilepsy model, we observed a**  
40 **spreading eCB wave following a calcium wave in mouse hippocampus. In summary,**  
41 **GRAB<sub>eCB2.0</sub> is a powerful new probe to resolve eCB release and dynamics under both**  
42 **physiological and pathological conditions.**

43

44 Cannabis derivatives have long been used for medicinal and recreational purposes across

45 cultures in formulations such as marijuana and hashish<sup>1</sup>. Bioactive compounds in cannabis,  
46 phytocannabinoids, exert their function by hijacking the endocannabinoid system in our  
47 body. The biological function of endocannabinoids (eCBs), majorly two lipid metabolites 2-  
48 arachidonoylglycerol (2-AG) and anandamide (AEA), is primarily mediated by the  
49 activation of two G protein-coupled receptors (GPCRs), cannabinoid receptor type 1  
50 (CB1R) and type 2 (CB2R)<sup>2</sup>. As important neuromodulators, eCBs are widely distributed in  
51 the peripheral and central nervous system. Interestingly, distinct from other classical  
52 neurotransmitters that are stored in synaptic vesicles and released from presynaptic  
53 terminals, eCBs are typically produced and released from the postsynaptic site in a  
54 neuronal activity-dependent manner, then retrogradely travel to the presynaptic terminal  
55 and activate the CB1R, activation of which often results in an inhibition of presynaptic  
56 neurotransmitter release<sup>3,4</sup>. In addition, eCBs can also function in glial cells and  
57 intracellular organelles<sup>5-9</sup>. eCBs participate in the short-term and long-term synaptic  
58 plasticity of glutamatergic and gamma-aminobutyric acid (GABA)-ergic synapses in a  
59 variety of brain regions such as cerebral cortex, hippocampus, striatum, ventral tegmental  
60 area, amygdala and cerebellum<sup>4,10</sup>, and play important roles in many physiological  
61 processes including development, emotional state, pain, sleep/wake cycle, energy  
62 metabolism, reward, learning and memory<sup>11-15</sup>. Given the broad distribution and functions  
63 of eCBs, dysregulation of eCB system is tightly linked with a variety of disorders, including  
64 neuropsychiatric and neurodegenerative diseases, epilepsy, cancer, and others<sup>16-18</sup>.  
65 Therefore, the eCB system has become a therapeutic target for treating multiple  
66 neurological diseases<sup>19,20</sup>.

67 In contrast to the increasing knowledge about the eCB biochemistry and physiology,  
68 the spatiotemporal dynamics of eCBs in the brain remains largely unknown. Synaptic  
69 transmission mediated by classic neurotransmitters such as glutamate and GABA and their  
70 ionotropic receptors can happen in milliseconds timescale and is confined to the  
71 nanometer dimensions of the synaptic cleft<sup>21</sup>, while neuropeptides are thought to be  
72 secreted in seconds or minutes after stimulation and act at longer distances<sup>22</sup>. However,  
73 our understanding of eCB signaling is limited due to drawbacks of existing eCB detection  
74 methods. For example, qualitative and quantitative measurement of eCBs in brain tissues  
75 can provide valuable information on eCB levels. However, this usually relies on lipid  
76 extraction, purification and analysis by chromatography and mass spectrometry<sup>23,24</sup>,  
77 therefore, has poor spatial and temporal resolution and cannot detect eCBs *in vivo*.  
78 Electrophysiology, together with genetics and pharmacology, is frequently used to provide  
79 indirect measurement of eCB action by studying eCB-mediated synaptic modulation<sup>25-28</sup>.  
80 However, this method is mostly used in *in vitro* preparations with reduced physiological  
81 relevance and has poor spatial resolution. Microdialysis, while challenging for hydrophobic  
82 lipid molecules, has been used to monitor eCB abundance in the brain during  
83 pharmacological manipulations and behaviors<sup>29,30</sup>, but it has a long sampling interval  
84 (~minutes) that is well beyond the time scale of synaptic plasticity mediated by eCBs (~sub-  
85 second to seconds), preventing the accurate detection of eCBs in real time *in vivo*.  
86 Therefore, development of an *in vivo* eCB detection tool with satisfactory spatiotemporal  
87 resolution would meet a clear need in this field.

88 Recently, several GPCR- and circular-permuted (cp) fluorescent protein-based

89 sensors for neurotransmitters and neuromodulators were successfully developed<sup>31-39</sup>.  
90 Following this strategy, here we report a novel GPCR Activation Based eCB sensor  
91 GRAB<sub>eCB2.0</sub> (eCB2.0 for simplicity) based on the human CB1R and cpEGFP. eCB2.0  
92 exhibits proper membrane trafficking, high specificity, ~second-scale kinetics, ~800%  
93 fluorescence response to 2-AG and ~550% to AEA in cultured neurons. After validating the  
94 performance of eCB2.0 in cultured cells and acute brain slices, we are able to detected  
95 foot-shock evoked eCB signals in the amygdala in freely moving mice and eCB dynamics  
96 in the mouse hippocampus during running and seizures.

97

## 98 RESULTS

### 99 Development and *in vitro* characterization of GRAB<sub>eCB</sub> sensors

100 Among the two cannabinoid receptors, we chose CB1R as the eCB sensor scaffold,  
101 because it has a higher affinity towards eCBs than CB2R<sup>40</sup>. To start, we inserted the  
102 intracellular loop 3 (ICL3)-cpEGFP module from our recently developed GRAB<sub>NE</sub> sensor<sup>34</sup>  
103 into the ICL3 of human CB1R (**Fig. 1a**). After several rounds of screening for insertion site  
104 and GRAB<sub>NE</sub> ICL3 truncation, we generated the first generation eCB sensor named  
105 GRAB<sub>eCB1.0</sub> (eCB1.0 for simplicity), which showed a moderate response ( $\Delta F/F_0$  ~100%)  
106 and 3  $\mu$ M apparent affinity for 2-AG (**Fig. 1b** and **Extended Data Fig. 1a**). To further  
107 improve the dynamic range of the eCB sensor, we selected 8 sites in cpEGFP for individual  
108 random mutation based our the experience gained through the development of previous  
109 GRAB sensors<sup>31,33-35,37-39</sup> (**Extended Data Fig. 1b**). A combination of mutations from  
110 single-mutation candidates with improved performance resulted in GRAB<sub>eCB1.5</sub> (eCB1.5),  
111 which showed a higher response ( $\Delta F/F_0$  ~200%) than eCB1.0 (**Extended Data Fig. 1a**).  
112 We next focused on the CB1R ligand binding pocket, aiming to further improve the  
113 response and affinity of the sensor. Residues F177<sup>2.64</sup>, V196<sup>3.32</sup> and S383<sup>7.39</sup> were selected  
114 for targeted screening based on studies of CB1R structure<sup>41-46</sup> (**Extended Data Fig. 1c**).  
115 Interestingly, we found that eCB1.5 S383<sup>7.39T</sup> showed an increased response and a similar  
116 apparent affinity to 2-AG compared to eCB1.5, while eCB1.5 S383<sup>7.39T</sup> F177<sup>2.64A</sup> showed  
117 no response to 2-AG (**Extended Data Fig. 1a**). We thus named eCB1.5 S383<sup>7.39T</sup> as  
118 GRAB<sub>eCB2.0</sub> (eCB2.0), and eCB1.5 S383<sup>7.39T</sup> F177<sup>2.64A</sup> as GRAB<sub>eCBmut</sub> (eCBmut)  
119 (**Extended Data Fig. 2**), which is an eCB non-binding mutant sensor to be used as a  
120 negative control.

121 Both eCB2.0 and eCBmut exhibited proper cell membrane trafficking when expressed  
122 in HEK293T cells (**Fig. 1c**). Upon application of ligands, eCB2.0 showed concentration-  
123 dependent fluorescence increases to both 2-AG and AEA, with the maximum  $\Delta F/F_0$   
124 ~210%, and half maximal effective concentrations (EC<sub>50</sub>) of ~7.2  $\mu$ M for 2-AG and ~0.5  $\mu$ M  
125 for AEA. On the contrary, eCBmut showed no response to 2-AG or AEA at all  
126 concentrations tested (**Fig. 1d**). We then tested whether eCB2.0 signal was specific to  
127 eCBs but not other neurotransmitters. eCB2.0 responses to 10  $\mu$ M 2-AG and AEA were  
128 completely blocked by the CB1R inverse agonist AM251 (10  $\mu$ M), and eCB2.0 showed no  
129 response to other common neurotransmitters or neuromodulators (**Fig. 1e**). Next, we  
130 measured the kinetics of eCB2.0 by local micropressure (puff) application (**Fig. 1f**).  
131 HEK293T cells expressing eCB2.0 were exposed to puffs of 100  $\mu$ M 2-AG to measure the  
132 “on” kinetics, and cells expressing eCB2.0 and incubated in 10  $\mu$ M 2-AG were exposed to

133 puffs of 100  $\mu$ M AM251 to measure the “off” kinetics at room temperature. Time constants  
134 of on and off kinetics were  $\sim$ 1.6 s and  $\sim$ 11.2 s, respectively (**Fig. 1g**). To examine whether  
135 or not there is any potential downstream coupling of eCB sensors with intracellular  
136 signaling pathways, we first measured G-protein activation using a  $G_{\beta\gamma}$  BRET sensor based  
137 on the  $G_{\beta\gamma}$  binding region of phospho-ducin fused to NanoLuc luciferase. This unified BRET  
138 sensor was based upon similar systems<sup>47,48</sup>. 20  $\mu$ M 2-AG significantly increased the BRET  
139 signal in wild-type CB1R expressing cells, indicating that G-protein signaling was activated,  
140 but not in cells expressing eCB2.0, eCBmut or in blank control cells (**Fig. 1h**). We then  
141 measured  $\beta$ -arrestin recruitment using the Tango assay<sup>49</sup>. We found that AEA potently  
142 recruited  $\beta$ -arrestin in CB1R expressing cells but not in either eCB2.0, eCBmut or blank  
143 control cells (**Fig. 1i**). These data together demonstrate that eCB2.0 and eCBmut have no  
144 detectable coupling with the two main GPCR downstream effectors, implying that the  
145 expression and activation of eCB sensors themselves may have minimal perturbation to  
146 cell physiology.

147 To examine the performance of eCB sensors in neurons, we first sparsely expressed  
148 eCB2.0 in cultured rat cortical neurons. We found eCB2.0 targeted to the cell membrane  
149 throughout the neuron, including axons and dendrites, as indicated by the colocalization of  
150 eCB2.0 with the axonal presynaptic marker synaptophysin-mScarlet and the postsynaptic  
151 marker PSD95-mScarlet, respectively (**Fig. 2a**). To measure the response of eCB sensors,  
152 we infected cultured rat cortical neurons by adeno-associated viruses (AAVs) carrying  
153 eCB2.0 and eCBmut under the control of the human synapsin promoter, which enables  
154 efficient labeling of all neurons in the culture. eCB2.0 showed fluorescence responses to  
155 bath-applied 2-AG and AEA in a concentration-dependent manner. In contrast, eCBmut  
156 showed no response to 2-AG or AEA (**Fig. 2b,c**). The maximum responses of eCB2.0 to  
157 2-AG and AEA were  $\sim$ 800% and 550%, and  $EC_{50}$ s were  $\sim$ 17.2  $\mu$ M and  $\sim$ 0.7  $\mu$ M,  
158 respectively. eCB2.0 responses in neurites were higher than in somata (**Fig. 2d**). Bath  
159 application of the CB1R agonist WIN55212-2, which can activate eCB2.0 (**Extended Data**  
160 **Fig. 3a**), induced a fluorescence increase of eCB2.0 on neuronal membrane that was  
161 stable for as long as 2 hours (**Fig. 2e**). These results indicate minimal arrestin-mediated  
162 internalization or desensitization of eCB2.0 sensor in neurons, suggesting the utility of the  
163 sensor for long-term eCB imaging.

164

### 165 **Imaging endogenous eCBs in primary cultured neurons using eCB2.0**

166 Cultured neurons are commonly used for studying eCB mediated synaptic modulation<sup>28,50</sup>.  
167 Thus, we examined whether eCB2.0 can detect endogenous eCB release from primary rat  
168 cortical neurons. Firstly, we expressed eCB2.0 and a red glutamate sensor  $R^{ncp}$ -  
169 iGluSnFR<sup>51</sup> in neurons using AAVs to simultaneously record eCB and glutamate dynamics.  
170 Electrical field stimulation (100 pulses at 50 Hz) elicited robust eCB and glutamate signal  
171 increases (**Fig. 3a**), demonstrating that eCB2.0 is able to report endogenous eCB release  
172 and can be used together with red indicators. We then expressed eCB2.0 in neurons using  
173 AAVs and loaded neurons with red calcium dye Calbryte590 to simultaneously record  
174 eCBs and neuronal calcium activity. Again, 100 pulses at 50 Hz elicited strong calcium and  
175 eCB signals (**Fig. 3b**). The rise and decay kinetics of the calcium signal were faster than  
176 those of the eCB signal, consistent with the notion that eCB production is dependent on

177 calcium<sup>52</sup>. When we stimulated neurons by 1, 5, 10 and 20 pulses at 20 Hz, we observed  
178 progressively increased peak calcium and eCB signals. The peak eCB and peak calcium  
179 signals were highly correlated ( $R^2 = 0.99$ , **Fig. 3c**). Importantly, when we removed calcium  
180 from the extracellular solution, a 20-pulse-stimulation was unable to elicit either calcium or  
181 eCB signal (**Fig. 3c**), confirming the requirement of calcium activity on eCB release.

182 Next, we asked which specific eCB(s), namely, 2-AG and/or AEA, was released in  
183 cultured rat cortical neurons. 2-AG is mainly produced from diacylglycerol (DAG) by  
184 diacylglycerol lipase (DAGL) in postsynaptic neurons (**Fig. 3d**). After applying DO34, a  
185 potent and selective DAGL inhibitor<sup>53</sup>, the electrically evoked eCB signals were gradually  
186 decreased and were almost abolished after 30 min incubation (**Fig. 3e,f**), indicating 2-AG  
187 is mobilized via DAGL in cultured neurons. We further validated this by manipulating the  
188 eCB degradation pathways: JZL184, an inhibitor of the main 2-AG degrading enzyme  
189 monoacylglycerol lipase (MAGL)<sup>54</sup>, significantly prolonged the decay phase of evoked eCB  
190 signals (**Fig. 3g-i**); in contrast, URB597, an inhibitor of the main AEA degrading enzyme  
191 fatty acid amide hydrolase (FAAH)<sup>55</sup>, only slightly increased the decay time constant.  
192 These data together demonstrate that 2-AG, but not AEA, is the major eCB released from  
193 cultured rat cortical neurons in response to trains of electrical stimulation.

194 In addition to the stimuli-evoked eCB signals, we also observed spontaneous, local  
195 eCB transients in neurons in the absence of external stimulation (**Fig. 3j**). The amplitude  
196 and rise kinetics of the transient eCB signal were smaller and slower than that of a single-  
197 pulse evoked eCB signal from the same region of interest (ROI) (**Fig. 3k,l**), suggesting  
198 different releasing patterns of eCBs in these two conditions. The diameter of the transient  
199 signal was  $\sim 11.3 \mu\text{m}$  quantified by the full width at half maximum (FWHM) (**Fig. 3m**),  
200 consistent with previous speculations that eCB functions in local compartments<sup>56,57</sup>. These  
201 spontaneous transients were specific because no such transients were observed in the  
202 presence of AM251 (**Fig. 3l,n,o**).

203

#### 204 **Validation of eCB2.0 in acute mouse brain slices**

205 To further test the ability of eCB2.0 to detect endogenous eCBs in more physiological  
206 relevant conditions, we next expressed eCB sensors in acute mouse brain slices. We first  
207 injected AAVs carrying eCB2.0 or eCBmut into mouse dorsolateral striatum (DLS, **Fig. 4a**),  
208 where eCBs mediate short- and long-term depression and regulates motor behavior<sup>58-60</sup>.  
209 Four weeks after AAV injection, acute brain slices were prepared and the expression of  
210 eCB sensors could be visualized (**Fig. 4b**). The fluorescence signals evoked by electrical  
211 stimuli in the DLS was recorded by photometry. Two-pulse stimulation was sufficient to  
212 elicit robust fluorescence increases in a stimulation frequency-dependent manner, while 5-  
213 and 10-pulse stimuli elicited even larger signals (**Fig. 4c,d**). The rise and decay kinetics of  
214 eCB2.0 signals were  $\sim 0.8\text{--}1.2 \text{ s}$  and  $\sim 5.2\text{--}8.5 \text{ s}$  respectively, as quantified by half rise time  
215 and decay time constant (**Fig. 4d**). When we pre-treated brain slices with  $10 \mu\text{M}$  AM251,  
216 the same electrical stimuli failed to evoke an eCB2.0 signal change, indicating the eCB  
217 signals were specific (**Fig. 4e**). eCBmut showed no response to electrical stimuli, further  
218 demonstrating the signal specificity (**Fig. 4e**). 2-photon (2P) microscopic images of eCB2.0  
219 in striatal slices showed the expression of eCB2.0 and its response to bath-applied AEA  
220 (**Extended Data Fig. 4**). We also expressed the eCB2.0 in mouse hippocampal CA1 region,

221 where eCBs modulate both excitatory and inhibitory inputs<sup>61,62</sup>, and recorded eCB2.0  
222 signal in acute slices using 2P microscopy (**Fig. 4f,g**). Electrical stimuli from 5 pulses to  
223 100 pulses at 20 Hz evoked eCB2.0 fluorescence increases (**Fig. 4g,h**), similar to the  
224 results in DLS. Perfusion of 10  $\mu$ M AEA to the hippocampal slice evoked a large signal  
225 increase, which was blocked by further perfusion of 10  $\mu$ M AM251 (**Fig. 4i**). In the presence  
226 AM251, even 100 pulses no longer elicited eCB2.0 signal (**Fig. 4j**). These data together  
227 demonstrate that eCB2.0 can be used to detect endogenously released eCBs in acute  
228 brain slices with high sensitivity, specificity and spatiotemporal resolution.

229

### 230 **Detection of eCBs in basolateral amygdala during foot shock in freely moving mice**

231 Basolateral amygdala (BLA) is a key brain region mediating fear responses and processing  
232 aversive memories<sup>63</sup>. Previous studies demonstrated that the CB1R is highly expressed in  
233 the BLA, and the eCB system in BLA participates in stress expression<sup>64-66</sup>. To directly  
234 record eCB dynamics in animals during an aversive stimulus, we co-expressed eCB2.0 (or  
235 eCBmut) and mCherry in mouse BLA using AAVs and conducted local fiber photometry  
236 recordings (**Fig. 5a,b**). A 2-s electrical foot-shock stimulus induced a time-locked eCB2.0  
237 signal increase in the BLA (**Fig. 5c**), and the response was reproducible in 5 consecutive  
238 trials (**Fig. 5d**). As negative controls, mCherry and eCBmut showed no fluorescence  
239 change during the foot shock (**Fig. 5c,e**). The rise and decay kinetics of eCB2.0 signal  
240 were  $\sim$ 1.0 s and  $\sim$ 6.3 s respectively (**Fig. 5f**). Taken together, these data demonstrate that  
241 eCB2.0 can be used to measure eCB dynamics *in vivo* with high sensitivity and specificity  
242 in freely moving animals.

243

### 244 **Dual color imaging of eCB and calcium in mouse hippocampal CA1 during running 245 and seizures**

246 Have shown that eCB2.0 enables the detection of electrically evoked eCB signals in mouse  
247 hippocampal CA1 in acute slices, we then asked whether we could detect *in vivo* eCB  
248 dynamics in CA1 during behavior. We injected AAVs carrying eCB2.0 (or eCBmut) and a  
249 red calcium indicator jRGECO1a<sup>67</sup> in mouse CA1, and conducted head-fixed 2P dual-color  
250 imaging through an implanted cannula above the hippocampus (**Fig. 6a**). Expression of  
251 eCB2.0 and jRGECO1a was clearly observed in CA1 4-6 weeks after virus injection (**Fig.**  
252 **6b**). We focused on the *stratum pyramidale* layer, which is composed of pyramidal neuron  
253 somata and interneuron axons, including a class that densely express CB1R. When mice  
254 spontaneously ran on a treadmill (**Fig. 6c**), we found rapid increases of both calcium and  
255 eCB signals aligned to the start of running, and decreases of both signals when the running  
256 stopped (**Fig. 6d,e**). In the control group, which expressed eCBmut and jRGECO1a,  
257 calcium signals were intact while eCBmut showed no fluorescence change (**Fig. 6d,e**). The  
258 calcium signal appeared earlier than the eCB signal, although both signals had similar  
259 rising kinetics, while the decay phase of eCB signal was slower than that of the calcium  
260 signal (**Fig. 6f**). These results demonstrate that under normal physiological conditions, the  
261 eCB2.0 sensor enables detection of locomotion-induced eCB signals in mouse  
262 hippocampus *in vivo*.

263

264 Epilepsy is a neurological disease characterized by excessive and synchronous neuronal firing. eCBs are proposed to provide negative feedback during epilepsy to

265 attenuate the synaptic activity and protect the nervous system, which is exemplified by the  
266 observation that animals with compromised eCB system all exhibit a pro-epileptic  
267 phenotype<sup>68</sup>. To explore whether eCB2.0 could be used to study seizure-related eCB  
268 signals *in vivo*, we used electrical kindling stimulation of the hippocampus contralateral to  
269 the sensor expressing hemisphere to elicit brief self-terminating seizures (**Fig. 6g**). Strong  
270 calcium and eCB signal increases were detected during electrical seizure activity (**Fig. 6h**).  
271 Recent work has shown that seizures are often followed by a spreading calcium wave that  
272 propagates across the cell layer<sup>69</sup>. Interestingly, we also found a propagating eCB wave  
273 that closely followed the calcium wave (**Fig. 6h and Extended Data Movie 1**). In contrast,  
274 eCBmut showed no response during and after seizures (**Fig. 6i**). The velocity and direction  
275 of eCB waves were evident when we extracted the eCB2.0 signal from individual neurons  
276 in the field of view (**Fig. 6j,k**). Notably, eCB waves and calcium waves varied across  
277 experiment sessions and animals (**Fig. 6l**), but for each instance, the calcium and eCB  
278 waves were similar, in agreement with the calcium- and activity-dependence of the eCB  
279 signal. In summary, the running and seizure data demonstrate the ability of the eCB2.0  
280 sensor to report eCB dynamics with high specificity and high spatiotemporal resolution in  
281 both physiological and pathological conditions *in vivo*.

282

## 283 **DISCUSSION**

284 Here, we report the development and characterization of a genetically-encoded fluorescent  
285 sensor eCB2.0 for detecting eCBs both *in vitro* and *in vivo*. With high sensitivity, selectivity  
286 and kinetics, eCB2.0 enables the detection of endogenous eCB signals in cultured neurons  
287 and acute brain slices. eCB2.0 also enables detection of eCB release in the amygdala of  
288 freely behaving mice, running induced eCB signals in mouse hippocampus, as well as eCB  
289 waves in mouse hippocampus under seizure conditions.

290 The on kinetics of eCB2.0 measured by local micropressure application at room  
291 temperature is ~1.6 s, which is likely overestimated since the on kinetics of eCB2.0 signal  
292 in DLS slices and in the BLA *in vivo* was within or about 1 s. The temporal resolution of  
293 eCB2.0 is dramatically improved compared to microdialysis (minutes), and it may be further  
294 optimized in the future to capture faster signals<sup>70</sup>. Currently, eCB2.0 detects both 2-AG and  
295 AEA. Given 2-AG and AEA have different regulatory pathways, brain region and cell type  
296 specificities, the development of new sensors with distinct eCB molecular specificity, as  
297 well as different color spectra, would be also desirable for future studies.

298 eCB-mediated retrograde synaptic modulation was identified during the study of  
299 depolarization induced suppression of inhibition or excitation (DSI or DSE) in the  
300 hippocampus and cerebellum<sup>25,26,28</sup>. Those and subsequent experiments relied on the  
301 electrophysiological recordings of synaptic transmission in combination with  
302 pharmacological (such as activation and inhibition of cannabinoid receptors, inhibition of  
303 production or degradation enzymes) or genetic (such as knockout of corresponding  
304 receptors and enzymes) manipulations, thus lacking direct and physiologically relevant  
305 eCB detection. Moreover, recording on the somata of neurons is unable to capture the  
306 precise spatial distribution of eCBs. For example, DSI recorded from paired whole-cell  
307 recordings in hippocampal slices indicate that the depolarization of one neuron could inhibit  
308 GABAergic inputs to neurons ~20  $\mu\text{m}$  or less away from it, suggesting the diffusion distance

309 of eCBs from a single neuron<sup>25</sup>. Similar results were obtained in cerebellar slices using two  
310 separate stimulation electrodes to evoke eCB release from two dendritic regions of a single  
311 Purkinje cell<sup>56</sup>. These data demonstrate that eCB signaling is relatively local and is likely  
312 to be tightly controlled. However, the detailed spatial profile of eCB signal is still not known.  
313 In addition, although the sampling rate of electrophysiological recording is generally high  
314 (>kHz), the eCB signals revealed by the change of evoked postsynaptic currents (ePSCs)  
315 have a sampling interval of ~2 s, which forms a temporal bottleneck. eCB2.0, therefore, for  
316 the first time provides the opportunity to examine the eCB signal at high spatial (e.g.,  
317 synaptic) and temporal (sub-second) resolution, similar to studies using other  
318 neurotransmitter sensors<sup>71,72</sup>. In cultured neurons, we detected spontaneous eCB  
319 transients with a diameter of ~11  $\mu\text{m}$ , which is already smaller than the previous estimation  
320 of the eCB diffusion distance. It will be interesting to test whether the local transient signals  
321 originate from single spines.

322 We have demonstrated that eCB2.0 could be used in multiple preparations *in vitro* and  
323 *in vivo* to report real-time neuronal eCB dynamics. Given the complexity of the nervous  
324 system, future directions for research based on eCB2.0 applications may include the  
325 identity of cell types that release eCBs, the mechanisms and temporal properties of eCB  
326 release, characteristics of eCB diffusion, the duration of eCB signals, the nature of the cell  
327 types and subcellular elements targeted by eCBs and the effects on them. Answering these  
328 fundamental questions will significantly enrich our understanding of the mechanisms and  
329 functions of eCB signaling in neural circuits.

330 Malfunction of eCB system is associated with multiple neurological disorders including  
331 stress/anxiety, movement disorders, substance use disorders and epilepsy. The results of  
332 eCB detection during foot shock, running and seizure in mice show clear examples of how  
333 the eCB2.0 sensor could help to elucidate the fast eCB dynamics during both physiological  
334 and pathological processes. The eCB2.0 sensor should be able to detect all CB1R agonists  
335 (**Extended Data Fig. 3**) including  $\Delta$ -9-tetrahydrocannabinol ( $\Delta$ -9-THC) in the brain and  
336 periphery following drug administration. This would allow investigators to track the time  
337 course of  $\Delta$ -9-THC actions and the impact of cannabis drugs on eCB signaling. Thus, eCB  
338 sensors open a new era of endocannabinoid research aimed at understanding this system  
339 at unprecedented, physiologically-relevant spatial and temporal scales.

340



## 341 **METHODS**

### 342 **Molecular biology**

343 DNA fragments were amplified by PCR with primers (TSINGKE Biological Technology)  
344 containing 25–30 bp overlaps. Plasmids were constructed by restriction enzyme cloning or  
345 Gibson Assembly. Plasmid sequences were verified by Sanger sequencing. For  
346 characterization of eCB2.0 and eCBmut in HEK293T cells, eCB2.0 and eCBmut genes  
347 were cloned into pDisplay vector with a IgK leader sequence before the sensor gene. An  
348 IRES-mCherry-CAAX cassette was inserted after the sensor gene for indicating cell  
349 membrane and calibrating the sensor fluorescence. For characterization of eCB2.0 in  
350 neurons, eCB2.0 gene was cloned into pAAV vector under control of a human synapsin  
351 promoter (pAAV-hSyn), PSD95-mScarlet and synaptophysin-mScarlet genes were cloned  
352 into pDest vector under control of a CMV promoter. For the  $G_{\beta\gamma}$  sensor assay, human CB1  
353 was cloned into the pCI vector (Promega), eCB2.0 and eCBmut genes were cloned into  
354 the peGFP-C1 vector (Takara), replacing the eGFP open reading frame. For the Tango  
355 assay, CB1, eCB2.0 and eCBmut genes were cloned into pTango vector. pAAV-hsyn-  
356 eCBmut and pAAV-hsyn- $R^{ncp}$ -iGluSnFR were also constructed for virus production.

357

### 358 **AAV virus preparation**

359 AAV2/9-hSyn-eCB2.0 ( $9.5 \times 10^{13}$  viral genomes (vg)/mL), AAV2/9-hSyn-eCBmut ( $8.0 \times 10^{13}$   
360 vg/mL), AAV2/9-hSyn- $R^{ncp}$ -iGluSnFR ( $6.2 \times 10^{13}$  vg/mL, all packaged at Vigene  
361 Biosciences, China), AAV8-hSyn-mCherry (#114472, Addgene) and AAV1-Syn-NES-  
362 jRGECO1a-WPRE-SV40 (Penn Vector Core) were used to infect cultured neurons or *in*  
363 *vivo*.

364

### 365 **Cell cultures**

366 HEK293T cells were cultured at 37°C, 5% CO<sub>2</sub> in DMEM (Biological Industries)  
367 supplemented with 10% (v/v) fetal bovine serum (Gibco) and penicillin (100 unit/mL)-  
368 streptomycin (0.1 mg/mL) (Biological Industries). HEK293T cells were plated on 96-well  
369 plates or 12 mm glass coverslips in 24-well plates. Cells at 60–70% confluency were  
370 transfected with plasmids using polyethylenimine (PEI) (300 ng DNA/well for 96-well plates  
371 and 1  $\mu$ g DNA/well for 24-well plates, DNA:PEI = 1:3) for 4–6 h before changing fresh  
372 culture medium. Imaging was performed 24–36 h after transfection. Rat cortical neurons  
373 were prepared from postnatal day 0 (P0) Sprague-Dawley rat. Briefly, rat cortical neurons  
374 were dissociated from rat brain cortex after dissection and digestion in 0.25% Trypsin-  
375 EDTA (Biological Industries), and plated in 12 mm glass coverslips in 24-well plates coated  
376 with poly-D-lysine (Sigma-Aldrich). Neurons were cultured at 37°C, 5% CO<sub>2</sub> in Neurobasal  
377 Medium (Gibco) supplemented with 2% B-27 Supplement (Gibco), 1% GlutaMAX (Gibco),  
378 and penicillin (100 unit/mL)-streptomycin (0.1 mg/mL) (Biological Industries). Cultured  
379 neurons were transfected at 7–9 day *in vitro* (DIV7–9) using calcium phosphate  
380 transfection method. Imaging was performed 48 h after transfection. Cultured neurons  
381 were infected by AAVs expressing eCB2.0, eCBmut and  $R^{ncp}$ -iGluSnFR at DIV3–5, and  
382 imaging was performed at DIV12–20. Calbryte590 (AAT Bioquest) was loaded into neurons  
383 for 1 h before imaging.

384

## 385 **Animals**

386 All experiment protocols were approved by the respective Laboratory Animal Care and Use  
387 Committees of Peking University, National Institute on Alcohol Abuse and Alcoholism, Cold  
388 Spring Harbor Laboratory (CSHL) and Stanford University, and studies were performed in  
389 accordance with the guidelines by the US National Institutes of Health. Postnatal day 0  
390 (P0) Sprague-Dawley rats of both sexes (Beijing Vital River Laboratory) and P42–P150  
391 C57BL/6J mice of both sexes (Beijing Vital River Laboratory and The Jackson Laboratory)  
392 were used in this study. Mice were housed under a normal 12 h light/dark cycle with food  
393 and water available *ad libitum*.

394

## 395 **Confocal imaging in cultured cells**

396 Before imaging, the culture medium for cells was replaced with Tyrode's solution consisting  
397 of (in mM): 150 NaCl, 4 KCl, 2 MgCl<sub>2</sub>, 2 CaCl<sub>2</sub>, 10 HEPES, and 10 glucose (pH 7.4). 0 mM  
398 Ca<sup>2+</sup> Tyrode's solution contained 0 mM CaCl<sub>2</sub> and 2 mM EGTA. The Opera Phenix high-  
399 content screening system (PerkinElmer, USA) was used for imaging HEK293T cells in 96-  
400 well plates. It was equipped with a 60x/1.15 NA water-immersion objective, a 488 nm laser  
401 and a 561 nm laser. A 525/50 nm emission filter and a 600/30 nm emission filter were used  
402 to collect green and red fluorescence respectively. A Ti-E A1 confocal microscopy (Nikon,  
403 Japan) was used for imaging cultured cells in 12 mm coverslips. It was equipped with a  
404 10x/0.45 NA objective, a 20x/0.75 NA objective, a 40x/1.35 NA oil-immersion objective, a  
405 488 nm laser and a 561 nm laser. A 525/50 nm emission filter and a 595/50 nm emission  
406 filter were used to collect green and red fluorescence respectively. Drugs, including 2-AG  
407 (Tocris), AEA (Cayman), AM251 (Tocris), LPA (Tocris), S1P (Tocris), ACh (Solarbio), DA  
408 (Sigma-Aldrich), GABA (Tocris), Glu (Sigma-Aldrich), Gly, NE (Tocris), 5-HT (Tocris), His  
409 (Tocris), Epi (Sigma-Aldrich), Ado (Tocris), Tyr (Sigma-Aldrich), WIN55212-2 (Cayman),  
410 DO34 (MCE), JZL184 (Cayman), URB597 (Cayman) were applied by replacing drug-  
411 containing Tyrode's solution for 96-well plate imaging, or applied by bath application or by  
412 a custom made perfusion system for 12 mm coverslip imaging. The micropressure  
413 application of drugs was controlled by Pneumatic PicoPump PV800 (World Precision  
414 Instruments). Cultured neurons were field stimulated using parallel platinum electrodes at  
415 a distance of 1 cm controlled by a Grass S88 stimulator (Grass Instruments). The voltage  
416 was 80 V and the duration of each stimulation pulse was 1 ms.

417

## 418 **BRET G<sub>βγ</sub> sensor assay**

419 eCB2.0, eCBmut or CB1 genes were transfected using PEI into HEK293 tsA201 cells in  
420 24 well plates in a 1:5 plasmid mass ratio with a single construct designed to separately  
421 express human GNAOa, human GNB1 (fused to amino acids 156-239 of Venus), human  
422 GNG2 (fused to amino acids 2-155 of Venus) and NanoLuc (Promega) fused to the amino  
423 terminal 112 amino acids of human phosducin circularly permuted at amino acids 54/55.  
424 The NanoLuc/phosducin fusion portion also contained a KRAS membrane targeting  
425 sequence on the carboxy terminal end. The G<sub>βγ</sub> sensor components were combined by  
426 either restriction enzyme cloning or InFusion (Takara) assembly. Templates for assembly  
427 were derived from human whole brain cDNA (Takara) for GNAOa and human retinal cDNA  
428 (Takara) for phosducin. Templates for hGNB1 and hGNG2 Venus fusions were a generous

429 gift from Nevin Lambert (Augusta University). Cells were harvested approximately 24 hours  
430 post-transfection with 10mM EDTA in PBS (pH7.2), pelleted and resuspended in  
431 Dulbecco's modified PBS (Life Technologies) without calcium or magnesium. Furimazine  
432 (Promega) was added at a 1/100 dilution to 100  $\mu$ l of cell suspension in a black 96 well  
433 plate and BRET readings were taken in a Pherastar FS plate reader (Berthold) equipped  
434 with a Venus BRET cube. Acceptor (Venus) and donor (NanoLuc) signals were monitored  
435 at 535nm and 475nm respectively. Net BRET was calculated as the acceptor/donor ratio  
436 of each sample minus the acceptor/donor ratio of a donor only sample. Readings were  
437 taken before and 2-4 minutes after agonist 2-AG (Tocris, 20  $\mu$ M final concentration)  
438 application to activate CB1 or eCB sensors.

439

#### 440 **Tango assay**

441 eCB2.0, eCBmut and CB1R genes fused with the tTA gene in pTango vectors were  
442 transfected into the HTLA reporter cell line using the PEI in 6 well plates. The HTLA cell  
443 line expresses a  $\beta$ -arrestin2-TEV fusion gene and a tTA-dependent luciferase reporter  
444 gene. 24 h after transfection, cells in 6 well plates were collected after trypsin treatment  
445 and plated in 96 well plates. CB1R agonist AEA was applied at concentrations ranging from  
446 0.01 nM to 10  $\mu$ M. The luciferase was expressed for 12 h before the luminescence  
447 measurement. Bright-Glo (5  $\mu$ M, Promega) was added and luminescence was measured  
448 by the VICTOR X5 multi-label plate reader (PerkinElmer).

449

#### 450 **Acute brain slices**

##### 451 *Photometry recording in the DLS in acute mouse brain slices*

452 Adult (> 10 weeks) male C57BL/6J mice were anesthetized with isoflurane and injected  
453 with AAV vectors into dorsal lateral striatum (300 nL, coordinates relative to bregma in mm:  
454 A/P: + 0.75; M/L:  $\pm$  2.5; D/V: - 3.5) at a rate of 50 nL/min. Mice were given an injection of  
455 ketoprofen (5 mg/kg, s.c.) and postoperative care was provided daily until mice regained  
456 their preoperative weight. After a minimum of 4 weeks following AAV injection, mice were  
457 deeply anesthetized with isoflurane, decapitated and the brains were extracted and placed  
458 in ice cold sucrose cutting solution (in mM): 194 sucrose, 30 NaCl, 4.5 KCl, 26 NaHCO<sub>3</sub>,  
459 1.2 NaH<sub>2</sub>PO<sub>4</sub>, 10 D-glucose, 1 MgCl<sub>2</sub> saturated with 5% CO<sub>2</sub>/ 95% O<sub>2</sub>. Coronal brain slices  
460 (250  $\mu$ m) were prepared and slices were incubated at 32°C for ~60 min in artificial  
461 cerebrospinal fluid (ACSF) (in mM): 124 NaCl, 4.5 KCl, 26 NaHCO<sub>3</sub>, 1.2 NaH<sub>2</sub>PO<sub>4</sub>, 10 D-  
462 glucose, 1 MgCl<sub>2</sub>, 2 CaCl<sub>2</sub>. After incubation at 32°C, slices were held at room temperature  
463 until initiating an experiment. Photometry recordings were acquired using an Olympus  
464 BX41 upright epifluorescence microscope equipped with a 40x/0.8 NA water-emersion  
465 objective and a FITC filter set. Slices were superfused at ~2 mL/min with ACSF (29–31°C).  
466 A twisted bipolar polyimide-coated stainless-steel stimulating electrode (~200  $\mu$ m tip  
467 separation) was placed in the DLS just medial to the corpus callosum and slightly below  
468 the tissue surface in a region with visible eCB sensors fluorescence. GRAB<sub>eCB</sub> sensors  
469 were excited using a 470 nm light emitting diode (LED) (ThorLabs, USA). Photons passing  
470 through a 180  $\mu$ m<sup>2</sup> aperture, positioned just lateral to the stimulating electrode, were  
471 directed to a PMT (Model D-104, Photon Technology International, USA). The PMT output  
472 was amplified (gain: 0.1  $\mu$ A/V; time constant: 5 ms), filtered at 50 Hz and digitized at 250

473 Hz using a Digidata 1550B and Clampex software (Molecular Devices LLC, USA). For all  
474 experiments, GRAB<sub>eCB</sub> measurements were acquired as discrete trials repeated every 3  
475 minutes. For each trial, the light exposure period was 35–45 seconds to minimize GRAB<sub>eCB</sub>  
476 photobleaching, while capturing peak responses and the majority of the decay phase. To  
477 evoke an eCB transient, a train of electrical pulses (1.0–1.5 mA, 200–500  $\mu$ s) was delivered  
478 5 s after initiating GRAB<sub>eCB</sub> excitation.

#### 479 *2-photon imaging in the hippocampus in acute mouse brain slices*

480 Adult (6–8 weeks) C57BL/6J mice of both sexes were anesthetized with an intraperitoneal  
481 injection of 2,2,2-tribromoethanol (Avertin, 500 mg/kg body weight, Sigma-Aldrich) and  
482 injected with AAV vectors into hippocampal CA1 (400 nL, coordinates relative to bregma  
483 in mm: A/P: – 1.8; M/L:  $\pm$  1.0; D/V: – 1.2) at a rate of 46 nL/min. After a minimum of 4 weeks  
484 following AAV injection, mice were deeply anesthetized with an intraperitoneal injection of  
485 2,2,2-tribromoethanol, decapitated and the brains were extracted and placed in ice cold  
486 choline chloride cutting solution (in mM): 110 choline-Cl, 2.5 KCl, 0.5 CaCl<sub>2</sub>, 7 MgCl<sub>2</sub>, 1  
487 NaH<sub>2</sub>PO<sub>4</sub>, 1.3 Na ascorbate, 0.6 Na pyruvate, 25 NaHCO<sub>3</sub> and 25 glucose saturated with  
488 5% CO<sub>2</sub>/ 95% O<sub>2</sub>. Coronal brain slices (300  $\mu$ m) were prepared and slices were incubated  
489 at 34°C for ~40 min in modified ACSF solution (in mM): 125 NaCl, 2.5 KCl, 2 CaCl<sub>2</sub>, 1.3  
490 MgCl<sub>2</sub>, 1 NaH<sub>2</sub>PO<sub>4</sub>, 1.3 Na ascorbate, 0.6 Na pyruvate, 25 NaHCO<sub>3</sub> and 25 glucose  
491 saturated with 5% CO<sub>2</sub>/ 95% O<sub>2</sub>. 2-photon imaging were performed under an FV1000MPE  
492 2-photon microscope (Olympus) equipped with a 25x/1.05 NA water-immersion objective  
493 and a mode-locked Mai Tai Ti: Sapphire laser (Spectra-Physics). Slices were superfused  
494 at ~4 mL/min with modified ACSF (32–34°C). A 920 nm laser was used to excite eCB2.0  
495 sensor, and fluorescence was collected using a 495–540 nm filter. For electrical stimulation,  
496 a bipolar electrode (cat. number WE30031.0A3, MicroProbes for Life Science) was  
497 positioned near the Stratum radiatum layer in CA1 using fluorescence guidance.  
498 Fluorescence imaging and electrical stimulation were synchronized using an Arduino board  
499 with custom-written programs. All images collected during electrical stimulation were  
500 recorded at a frame rate of 0.3583 s/frame with 256 $\times$ 192 pixels per frame. The stimulation  
501 voltage was 4–6 V, and the pulse duration was 1 ms. Drugs were applied to the imaging  
502 chamber by perfusion at a flow rate at 4 mL/min.

503

#### 504 **Fiber photometry recording of eCB signals in the BLA during foot shock**

505 Adult (10–12 weeks) C57 BL/6J mice of both sexes were injected with 300 nL of a 10:1  
506 mixture of AAV-hSyn-eCB2.0 and AAV-hSyn-mCherry viruses, or a 10:1 mixture of AAV-  
507 hSyn-eCBmut and AAV-hSyn-mCherry viruses, into the right basolateral amygdala at A/P  
508 –1.78 mm, M/L –3.30 mm, D/V –4.53 mm (relative to Bregma). Virus injection was  
509 performed using a glass pipette with a Picospritzer III microinjection system (Parker  
510 Hannifin, USA). After injection, a 200- $\mu$ m-diameter, 0.37 NA fiber (Inper, China) was  
511 implanted into the same location, and secured with self-adhesive resin cement (3M). A  
512 head bar was also mounted with resin cement onto the skull. At least 14 days were waited  
513 before doing photometry recording. Photometry recording was taken using a commercial  
514 photometry system (Neurophotometrics, USA). A patch cord (0.37 NA, Doric Lenses,  
515 Canada) was attached to the photometry system, and to the fiber in the mouse brain. A  
516 470 nm LED was used to excite eCB and eCBmut sensors, and a 560 nm LED was used

517 to excite mCherry. The average power levels of LED (measured at the output end of the  
518 patch cord) were 160  $\mu$ W for eCB/eCBmut sensors, and 25  $\mu$ W for mCherry. The recording  
519 frequency was 10 Hz. Photometry data were acquired with Bonsai 2.3.1 software. Mice  
520 were free-moving in a shock box (Habitest, Coulbourn Instruments, USA) inside of a  
521 sound-proof behavior box with light on. The FreezeFrame software was used to generate  
522 triggers to the shock generator (Coulbourn Instruments) and Bonsai software. Five pulses  
523 of 2-s electric shocks with an intensity of 0.7 mA were delivered to the shock box with 90–  
524 120 s ITIs. After photometry recording, animals were perfused with phosphate-buffered  
525 saline (PBS), and subsequently with 4% paraformaldehyde (PFA) in PBS. Brain tissues  
526 were fixed in PFA solution overnight, and then were dehydrated with 30% sucrose in PBS  
527 solution for 24 h. Brain slices were cut using a Leica SM 2010R microtome (Leica  
528 Biosystems, USA). Floating brain slices were blocked (5% BSA, 0.1% Triton in PBS) at  
529 room temperature for 2 h, and then stained with chicken anti-GFP (1:1000, Aves, #GFP-  
530 1020) and rabbit anti-RFP (1:500, Rockland, #600-401-379) primary antibodies in antibody  
531 solution (3% BSA, 0.1% Triton in PBS) at 4 °C for 24 h. Slices were next rinsed with PBS  
532 15 min for 3 times, and stained with DAPI (5  $\mu$ g/mL, Invitrogen, #D1306), Alexa Fluor 488  
533 donkey anti-chicken (1:250, Jackson ImmunoResearch, #703-545-155) and Alexa Fluor  
534 568 donkey anti-rabbit (1:250, Invitrogen, #A10042) in antibody solution at 4 °C for 24 h.  
535 Confocal images were taken with a Zeiss LSM780 confocal microscopy (Zeiss, Germany).

536

### 537 **2-photon imaging in living mice**

538 Adult (P100– 150) C57BL/6J mice of both sexes were used. Mice were injected with a mix  
539 of AAV1-Syn-NES-jRGECO1a-WPRE-SV40 and AAV9-hSyn-eCB2.0 (or eCBmut) viruses  
540 (300-400 nL each, full titer) into the right CA1 (2.3 mm posterior, 1.5 mm lateral, 1.35 mm  
541 ventral to bregma) using a Hamilton syringe. After recovery from virus injection, the cortex  
542 above the injection site was aspirated and a stainless steel cannula with attached  
543 coverglass was implanted over the hippocampus as previously described<sup>73,74</sup>, followed by  
544 a stainless steel headbar. A chronic bipolar wire electrode (tungsten, 0.002", 0.5 mm tip  
545 separation, A-M systems) was implanted into the left ventral hippocampus (3.2 mm  
546 posterior, 2.7 mm lateral, 4.0 mm ventral to bregma) as previously described<sup>75</sup>. Head-fixed  
547 mice running on a linear treadmill with a cue-less belt (2 m) were imaged using a resonant  
548 scanner 2-photon microscope (Neurolabware), equipped with a pulsed IR laser tuned at  
549 1000 nm (Mai Tai, Spectra-Physics), GaAsP PMT detectors (H11706P-40, Hamamatsu),  
550 and a 16x objective (0.8 NA WI, Nikon). 2-photon image acquisition and treadmill speed  
551 monitoring were controlled by Scanbox (Neurolabware). Bipolar electrodes were recorded  
552 using a differential amplifier (Model 1700, A-M Systems). Seizures were elicited by electric  
553 stimulation above seizure threshold by 150  $\mu$ A of current delivered in 1ms biphasic pulses  
554 at 60Hz for 1 second, using a constant-current stimulator (A-M Systems model 2100).  
555 Following *in vivo* recordings, mice were anaesthetized by isoflurane, prior to an  
556 intraperitoneal injection of a mixture of ketamine (100 mg/kg) and Xylazine (10 mg/kg) in  
557 saline. Animals were transcardially perfused with saline (0.9% NaCl for 1 minute) and then  
558 with fixative solution (4% paraformaldehyde and 0.2% picric acid in 0.1 M phosphate buffer).  
559 Perfused brains were then post-fixed in the same fixative solution for 24 h at 4 °C, prior to  
560 slicing on a vibratome (VTS1200, Leica Biosystems). Sections were then washed and

561 mounted in Vectashield (Vector Laboratories). Confocal images were acquired on a Zeiss  
562 LSM 710 imaging system using a 20x 0.8 NA objective.

563

## 564 **Data processing**

### 565 *Confocal imaging*

566 Data were collected and analyzed using Harmony high-content imaging and analysis  
567 software (PerkinElmer) for 96-well plate imaging. Briefly, membrane regions were selected  
568 as ROIs and green fluorescence of sensors was normalized by red fluorescence of  
569 mCherry-CAAX (G/R).  $\Delta F/F_0$  was calculated as  $(G/R_{\text{after drug}} - G/R_{\text{before drug}}) / (G/R_{\text{before drug}})$ .  
570 For 12 mm coverslip imaging, data were collected using the NIS-Element software (Nikon)  
571 and analyzed using the ImageJ software (NIH).  $\Delta F/F_0$  was calculated as  $(F_t - F_0)/F_0$ , while  
572  $F_0$  was quantified before drug application or stimulation. Data were plotted using OriginPro  
573 2020 (OriginLab).

### 574 *Slice photometry and 2-photon imaging*

575 For slice photometry recording, eCB transients were calculated as  $\Delta F/F_0$  by averaging the  
576 PMT voltage (V) for a period of 1 s just prior to electrical stimulation ( $F_0$ ) and then  
577 calculating  $V/F_0 - 1$  for each digitized data sample. The eCB decay phase was fitted with a  
578 single exponential decay accounting for a sloping baseline. Rise  $t_{1/2}$  was calculated in  
579 Graphpad Prism (v8.3; San Diego, CA, USA) by fitting the rising phase of the eCB transient  
580 with an asymmetrical logistics curve. Photometry sweeps were exported to Microsoft Excel  
581 (v16.3; Redmond, WA, USA) to calculate normalized  $\Delta F/F_0$  traces and peak  $\Delta F/F_0$  values.  
582 For slice 2-photon imaging, data were collected using FV10-ASW (Olympus) and analyzed  
583 using ImageJ (NIH).  $\Delta F/F_0$  was calculated as  $(F_t - F_0)/F_0$ , while  $F_0$  was quantified before  
584 stimulation. Data were plotted using OriginPro 2020 (OriginLab).

### 585 *Fiber photometry in mice during foot shock*

586 Off-line analysis of the photometry data was conducted with the Matlab software  
587 (MathWorks). Data were plotted using OriginPro 2020 (OriginLab).

### 588 *2-photon imaging in mice during locomotion and seizure*

589 Imaging data were processed and analyzed using Python scripts. For the analysis of  
590 single-cell responses, movies were initially motion corrected by rigid translation, followed  
591 by non-rigid correction (*HiddenMarkov2D*) by the *sima* package<sup>76</sup>. Binary regions of  
592 interest (ROIs) were selected in a semi-automated manner. For the initial automated  
593 detection, movies were divided into segments of 100 frames each, the average intensity  
594 projection of each segment was computed and the resulting resampled movie was used  
595 for detection. In sessions with electric stimulation, only the baseline period before the  
596 stimulation was used for segmentation. The *PlaneCA1PC* method of *sima* was run on the  
597 inverted resampled movie, which resulted in detection of the hollow nuclei of cells. These  
598 ROIs were filtered based on size, and binary dilation was performed to include the  
599 cytoplasm around the nuclei. In a subsequent step, ROIs were detected in the non-inverted  
600 resampled movie, filtered based on size and those that did not overlap with existing ROIs  
601 were added to the set. ROIs outside the str. pyramidale were excluded. Next, the  
602 fluorescence intensity traces were extracted for each ROI by averaging the included pixel  
603 intensities within each frame. For analyzing run responses, only sessions with no electric  
604 stimuli were included, and signals were pulled from the motion-corrected movies. These

605 raw traces were processed following standard steps for obtaining  $\Delta F/F_0$  traces with a  
606 modified approach to determine the time-dependent baseline. A 3rd degree polynomial  
607 was fit on the trace after applying temporal smoothing, removing peaks (detected using  
608 continuous wavelet transform by `scipy.signal`), eliminating periods of running, and ignoring  
609 the beginning and end of the recording. The calculated polynomial was then used as a  
610 baseline. Z-scored traces were obtained after determining the standard deviation (SD) of  
611 each cell's baseline by excluding events exceeding 2 SD in two iterations.

612 For analyzing spreading activity, only sessions with electric stimulus that triggered an  
613 electrographic seizure and a spreading wave were included, and while the segmentation  
614 was performed based on the motion-corrected baseline segments of the recordings,  
615 signals were pulled from non-motion-corrected movies (as image-based motion correction  
616 was not feasible during seizures).  $\Delta F/F_0$  traces were obtained using a constant baseline  
617 determined by averaging the pre-stimulus segments of the traces. For the analysis  
618 changes in average fluorescence intensity, a single large region of interest (ROI) was  
619 manually drawn to include the cell bodies in the pyramidal layer, and  $\Delta F/F_0$  traces were  
620 pulled and processed as described above. Event-triggered averages were calculated after  
621 automatically detecting the frames with running onsets and stops by fixed criteria across  
622 all sessions. The average was computed in two steps (i.e. events were first averaged by  
623 cell, then cells averaged by virus type (eCB or eCBmut). Decay time constants were  
624 computed as the parameter of a 2nd degree polynomial fit after a log transform on the trace  
625 following the peak of the stop-triggered average trace. Rise times were determined  
626 between the frame where the start-triggered average signal first reached 90% of the range  
627 between baseline and peak, and the last frame before that where the signal was below 10%  
628 of the range. To determine the spreading speed and direction of waves, first the peak time  
629 of the wave was determined in each session by inspecting the average  $\Delta F/F_0$  trace  
630 (including all cells). Then, the relative peak location ( $\Delta t$ ) of the  $\Delta F/F_0$  trace of each cell in  
631 the trace including  $\pm 200$  frames (12.8 s) around the wave peak was determined. Finally,  
632 two linear fits were computed using the x and y centroid coordinates of each ROI ( $\Delta t \sim x$ ,  
633  $\Delta t \sim y$ ). The 2D speed was computed from the slopes of the two 1D fits. The direction was  
634 determined by computing the unity vector from the starting- to the end point of the fits  
635 between  $\pm 3$  s around the wave peak. The average speed was obtained by averaging the  
636 speed of individual sessions, while the average direction was obtained from the sum of the  
637 unity vectors of individual sessions. Data were plotted using Python and OriginPro 2020  
638 (OriginLab).

639

### 640 **Statistical analysis**

641 Values with error bars indicate mean  $\pm$  SEM. Group data were analyzed using the Student's  
642 t test or one-way ANOVA, \*\*\*p < 0.001, \*\*p < 0.01, \*p < 0.05; n.s., not significant, p > 0.05.

643

### 644 **Data and software availability**

645 Plasmids for expressing eCB2.0 and eCBmut used in this study were deposited at  
646 Addgene ([https://www.addgene.org/Yulong\\_Li/](https://www.addgene.org/Yulong_Li/)).

647

648

649 **ACKNOWLEDGMENTS**

650 This work was supported by Beijing Municipal Science & Technology Commission  
651 (Z181100001318002, Z181100001518004), National Natural Science Foundation of China  
652 (31925017), NIH BRAIN Initiative (NS103558), Shenzhen-Hong Kong Institute of Brain  
653 Science (NYKFKT2019013) and grants from the Peking-Tsinghua Center for Life Sciences  
654 and the State Key Laboratory of Membrane Biology at Peking University School of Life  
655 Sciences to Y.L.; a Division of Intramural Clinical and Biological Research of the NIAAA  
656 grant (ZIA AA000416) to D.M.L; a NIH BRAIN Initiative (NS103558) grant to J.D.; NIH  
657 grants (R01MH101214 and R01NS104944) to B.L.; an American Epilepsy Society  
658 Postdoctoral Fellowship and a NIH grant (K99NS117795) to B.D.; a Canadian Institutes for  
659 Health Research postdoctoral fellowship to J.S.F.; a NIH grant to I.S. (NS99457). We thank  
660 Li lab members for helpful discussions. We thank Yi Rao for sharing the 2-photon  
661 microscope and Xiaoguang Lei at PKU-CLS for providing support for the Opera Phenix  
662 high-content screening system.

663

664 **AUTHOR CONTRIBUTIONS**

665 Y.L. conceived the project. A.D., K.H., H.L.P., R.C. and J.D. performed experiments related  
666 to developing, optimizing, and characterizing the sensors in cultured HEK293T cells and  
667 neurons. L.J.D. performed the surgery and photometry recording experiments related to  
668 the validation of the sensor in DLS brain slices under the supervision of D.M.L.. A.D.  
669 performed the surgery and 2-photon imaging in the hippocampal brain slices. E.A.  
670 performed the surgery and 2-photon imaging in the striatal brain slices under the  
671 supervision of J.D.. W. G. performed fiber photometry recordings in freely moving mice  
672 during foot shock under the supervision of B.L.. B.D. and J.S.F. performed the *in vivo* 2-  
673 photon imaging in the hippocampus in mice during running and seizure under the  
674 supervision of I.S. All authors contributed to the data interpretation and analysis. A.D. and  
675 Y.L. wrote the manuscript with input from other authors.

676

677 **COMPETING FINANCIAL INTERESTS**

678 Y. L. has filed patent applications whose value might be affected by this publication.

679

680 **REFERENCES**

- 681 1. Zuardi, A.W. History of cannabis as a medicine: a review. *Braz J Psychiatry* **28**, 153-157  
682 (2006).
- 683 2. Piomelli, D. The molecular logic of endocannabinoid signalling. *Nat Rev Neurosci* **4**, 873-  
684 884 (2003).
- 685 3. Wilson, R.I. & Nicoll, R.A. Endocannabinoid signaling in the brain. *Science* **296**, 678-682  
686 (2002).
- 687 4. Kano, M., Ohno-Shosaku, T., Hashimotodani, Y., Uchigashima, M. & Watanabe, M.  
688 Endocannabinoid-mediated control of synaptic transmission. *Physiological reviews* **89**, 309-380  
689 (2009).
- 690 5. Hebert-Chatelain, E., *et al.* A cannabinoid link between mitochondria and memory. *Nature*  
691 **539**, 555-559 (2016).
- 692 6. Benard, G., *et al.* Mitochondrial CB(1) receptors regulate neuronal energy metabolism. *Nat*



- 693 *Neurosci* **15**, 558-564 (2012).
- 694 7. Jimenez-Blasco, D., *et al.* Glucose metabolism links astroglial mitochondria to cannabinoid  
695 effects. *Nature* **583**, 603-608 (2020).
- 696 8. Stella, N. Cannabinoid signaling in glial cells. *Glia* **48**, 267-277 (2004).
- 697 9. Navarrete, M., Diez, A. & Araque, A. Astrocytes in endocannabinoid signalling. *Philos*  
698 *Trans R Soc Lond B Biol Sci* **369**, 20130599 (2014).
- 699 10. Chevalyere, V., Takahashi, K.A. & Castillo, P.E. Endocannabinoid-mediated synaptic  
700 plasticity in the CNS. *Annu Rev Neurosci* **29**, 37-76 (2006).
- 701 11. Oddi, S., Scipioni, L. & Maccarrone, M. Endocannabinoid system and adult neurogenesis:  
702 a focused review. *Curr Opin Pharmacol* **50**, 25-32 (2020).
- 703 12. Moreira, F.A. & Lutz, B. The endocannabinoid system: emotion, learning and addiction.  
704 *Addict Biol* **13**, 196-212 (2008).
- 705 13. Guindon, J. & Hohmann, A.G. The endocannabinoid system and pain. *CNS Neurol Disord*  
706 *Drug Targets* **8**, 403-421 (2009).
- 707 14. Kesner, A.J. & Lovinger, D.M. Cannabinoids, Endocannabinoids and Sleep. *Frontiers in*  
708 *molecular neuroscience* **13**, 125 (2020).
- 709 15. Silvestri, C. & Di Marzo, V. The endocannabinoid system in energy homeostasis and the  
710 etiopathology of metabolic disorders. *Cell Metab* **17**, 475-490 (2013).
- 711 16. Katona, I. & Freund, T.F. Endocannabinoid signaling as a synaptic circuit breaker in  
712 neurological disease. *Nat Med* **14**, 923-930 (2008).
- 713 17. Fernandez-Espejo, E., Viveros, M.P., Nunez, L., Ellenbroek, B.A. & Rodriguez de Fonseca,  
714 F. Role of cannabis and endocannabinoids in the genesis of schizophrenia.  
715 *Psychopharmacology (Berl)* **206**, 531-549 (2009).
- 716 18. Fraguas-Sanchez, A.I., Martin-Sabroso, C. & Torres-Suarez, A.I. Insights into the effects  
717 of the endocannabinoid system in cancer: a review. *Br J Pharmacol* **175**, 2566-2580 (2018).
- 718 19. Patel, S., Hill, M.N., Cheer, J.F., Wotjak, C.T. & Holmes, A. The endocannabinoid system  
719 as a target for novel anxiolytic drugs. *Neurosci Biobehav Rev* **76**, 56-66 (2017).
- 720 20. Ligresti, A., Petrosino, S. & Di Marzo, V. From endocannabinoid profiling to  
721 'endocannabinoid therapeutics'. *Curr Opin Chem Biol* **13**, 321-331 (2009).
- 722 21. Sabatini, B.L. & Regehr, W.G. Timing of synaptic transmission. *Annu Rev Physiol* **61**, 521-  
723 542 (1999).
- 724 22. van den Pol, A.N. Neuropeptide transmission in brain circuits. *Neuron* **76**, 98-115 (2012).
- 725 23. Zoerner, A.A., *et al.* Quantification of endocannabinoids in biological systems by  
726 chromatography and mass spectrometry: a comprehensive review from an analytical and  
727 biological perspective. *Biochim Biophys Acta* **1811**, 706-723 (2011).
- 728 24. Marchioni, C., *et al.* Recent advances in LC-MS/MS methods to determine  
729 endocannabinoids in biological samples: Application in neurodegenerative diseases. *Anal Chim*  
730 *Acta* **1044**, 12-28 (2018).
- 731 25. Wilson, R.I. & Nicoll, R.A. Endogenous cannabinoids mediate retrograde signalling at  
732 hippocampal synapses. *Nature* **410**, 588-592 (2001).
- 733 26. Kreitzer, A.C. & Regehr, W.G. Retrograde inhibition of presynaptic calcium influx by  
734 endogenous cannabinoids at excitatory synapses onto Purkinje cells. *Neuron* **29**, 717-727  
735 (2001).
- 736 27. Maejima, T., Hashimoto, K., Yoshida, T., Aiba, A. & Kano, M. Presynaptic inhibition caused

- 737 by retrograde signal from metabotropic glutamate to cannabinoid receptors. *Neuron* **31**, 463-  
738 475 (2001).
- 739 28. Ohno-Shosaku, T., Maejima, T. & Kano, M. Endogenous cannabinoids mediate retrograde  
740 signals from depolarized postsynaptic neurons to presynaptic terminals. *Neuron* **29**, 729-738  
741 (2001).
- 742 29. Wiskerke, J., *et al.* Characterization of the effects of reuptake and hydrolysis inhibition on  
743 interstitial endocannabinoid levels in the brain: an in vivo microdialysis study. *ACS Chem*  
744 *Neurosci* **3**, 407-417 (2012).
- 745 30. Walker, J.M., Huang, S.M., Strangman, N.M., Tsou, K. & Sanudo-Pena, M.C. Pain  
746 modulation by release of the endogenous cannabinoid anandamide. *Proc Natl Acad Sci U S A*  
747 **96**, 12198-12203 (1999).
- 748 31. Sun, F., *et al.* A Genetically Encoded Fluorescent Sensor Enables Rapid and Specific  
749 Detection of Dopamine in Flies, Fish, and Mice. *Cell* **174**, 481-496 e419 (2018).
- 750 32. Patriarchi, T., *et al.* Ultrafast neuronal imaging of dopamine dynamics with designed  
751 genetically encoded sensors. *Science* **360**(2018).
- 752 33. Jing, M., *et al.* A genetically encoded fluorescent acetylcholine indicator for in vitro and in  
753 vivo studies. *Nat Biotechnol* **36**, 726-737 (2018).
- 754 34. Feng, J., *et al.* A Genetically Encoded Fluorescent Sensor for Rapid and Specific In Vivo  
755 Detection of Norepinephrine. *Neuron* **102**, 745-761 e748 (2019).
- 756 35. Peng, W., *et al.* Regulation of sleep homeostasis mediator adenosine by basal forebrain  
757 glutamatergic neurons. *Science* **369**(2020).
- 758 36. Patriarchi, T., *et al.* An expanded palette of dopamine sensors for multiplex imaging in vivo.  
759 *Nat Methods* (2020).
- 760 37. Jing, M., *et al.* An optimized acetylcholine sensor for monitoring in vivo cholinergic activity.  
761 *Nature Methods* (2020).
- 762 38. Sun, F., *et al.* New and improved GRAB fluorescent sensors for monitoring dopaminergic  
763 activity *in vivo*. 2020.2003.2028.013722 (2020).
- 764 39. Wan, J., *et al.* A genetically encoded GRAB sensor for measuring serotonin dynamics  
765 *in vivo*. 2020.2002.2024.962282 (2020).
- 766 40. Howlett, A.C., *et al.* International Union of Pharmacology. XXVII. Classification of  
767 cannabinoid receptors. *Pharmacol Rev* **54**, 161-202 (2002).
- 768 41. Hua, T., *et al.* Crystal structures of agonist-bound human cannabinoid receptor CB1.  
769 *Nature* **547**, 468-471 (2017).
- 770 42. Hua, T., *et al.* Crystal Structure of the Human Cannabinoid Receptor CB1. *Cell* **167**, 750-  
771 762 e714 (2016).
- 772 43. Krishna Kumar, K., *et al.* Structure of a Signaling Cannabinoid Receptor 1-G Protein  
773 Complex. *Cell* **176**, 448-458 e412 (2019).
- 774 44. Li, X., *et al.* Crystal Structure of the Human Cannabinoid Receptor CB2. *Cell* **176**, 459-467  
775 e413 (2019).
- 776 45. Shao, Z., *et al.* Structure of an allosteric modulator bound to the CB1 cannabinoid receptor.  
777 *Nat Chem Biol* **15**, 1199-1205 (2019).
- 778 46. Shao, Z., *et al.* High-resolution crystal structure of the human CB1 cannabinoid receptor.  
779 *Nature* (2016).
- 780 47. Masuho, I., *et al.* Distinct profiles of functional discrimination among G proteins determine

- 781 the actions of G protein-coupled receptors. *Sci Signal* **8**, ra123 (2015).
- 782 48. Hollins, B., Kuravi, S., Digby, G.J. & Lambert, N.A. The c-terminus of GRK3 indicates rapid  
783 dissociation of G protein heterotrimers. *Cell Signal* **21**, 1015-1021 (2009).
- 784 49. Kroeze, W.K., *et al.* PRESTO-Tango as an open-source resource for interrogation of the  
785 druggable human GPCRome. *Nat Struct Mol Biol* **22**, 362-369 (2015).
- 786 50. Kim, S.H., Won, S.J., Mao, X.O., Jin, K. & Greenberg, D.A. Molecular mechanisms of  
787 cannabinoid protection from neuronal excitotoxicity. *Mol Pharmacol* **69**, 691-696 (2006).
- 788 51. Wu, J., *et al.* Genetically Encoded Glutamate Indicators with Altered Color and Topology.  
789 *ACS Chem Biol* **13**, 1832-1837 (2018).
- 790 52. Alger, B.E. Retrograde signaling in the regulation of synaptic transmission: focus on  
791 endocannabinoids. *Prog Neurobiol* **68**, 247-286 (2002).
- 792 53. Ogasawara, D., *et al.* Rapid and profound rewiring of brain lipid signaling networks by  
793 acute diacylglycerol lipase inhibition. *Proc Natl Acad Sci U S A* **113**, 26-33 (2016).
- 794 54. Long, J.Z., *et al.* Selective blockade of 2-arachidonoylglycerol hydrolysis produces  
795 cannabinoid behavioral effects. *Nat Chem Biol* **5**, 37-44 (2009).
- 796 55. Mor, M., *et al.* Cyclohexylcarbamic acid 3'- or 4'-substituted biphenyl-3-yl esters as fatty  
797 acid amide hydrolase inhibitors: synthesis, quantitative structure-activity relationships, and  
798 molecular modeling studies. *J Med Chem* **47**, 4998-5008 (2004).
- 799 56. Brenowitz, S.D. & Regehr, W.G. Associative short-term synaptic plasticity mediated by  
800 endocannabinoids. *Neuron* **45**, 419-431 (2005).
- 801 57. Soler-Llavina, G.J. & Sabatini, B.L. Synapse-specific plasticity and compartmentalized  
802 signaling in cerebellar stellate cells. *Nat Neurosci* **9**, 798-806 (2006).
- 803 58. Lerner, T.N. & Kreitzer, A.C. RGS4 is required for dopaminergic control of striatal LTD and  
804 susceptibility to parkinsonian motor deficits. *Neuron* **73**, 347-359 (2012).
- 805 59. Gerdeman, G.L., Ronesi, J. & Lovinger, D.M. Postsynaptic endocannabinoid release is  
806 critical to long-term depression in the striatum. *Nat Neurosci* **5**, 446-451 (2002).
- 807 60. Kreitzer, A.C. & Malenka, R.C. Endocannabinoid-mediated rescue of striatal LTD and  
808 motor deficits in Parkinson's disease models. *Nature* **445**, 643-647 (2007).
- 809 61. Yasuda, H., Huang, Y. & Tsumoto, T. Regulation of excitability and plasticity by  
810 endocannabinoids and PKA in developing hippocampus. *Proc Natl Acad Sci U S A* **105**, 3106-  
811 3111 (2008).
- 812 62. Edwards, D.A., Zhang, L. & Alger, B.E. Metaplastic control of the endocannabinoid system  
813 at inhibitory synapses in hippocampus. *Proc Natl Acad Sci U S A* **105**, 8142-8147 (2008).
- 814 63. Li, B. Central amygdala cells for learning and expressing aversive emotional memories.  
815 *Curr Opin Behav Sci* **26**, 40-45 (2019).
- 816 64. Katona, I., *et al.* Distribution of CB1 cannabinoid receptors in the amygdala and their role  
817 in the control of GABAergic transmission. *J Neurosci* **21**, 9506-9518 (2001).
- 818 65. Morena, M., Patel, S., Bains, J.S. & Hill, M.N. Neurobiological Interactions Between Stress  
819 and the Endocannabinoid System. *Neuropsychopharmacology* **41**, 80-102 (2016).
- 820 66. Gunduz-Cinar, O., Hill, M.N., McEwen, B.S. & Holmes, A. Amygdala FAAH and  
821 anandamide: mediating protection and recovery from stress. *Trends Pharmacol Sci* **34**, 637-  
822 644 (2013).
- 823 67. Dana, H., *et al.* Sensitive red protein calcium indicators for imaging neural activity. *Elife*  
824 **5**(2016).

- 825 68. Soltesz, I., *et al.* Weeding out bad waves: towards selective cannabinoid circuit control in  
826 epilepsy. *Nat Rev Neurosci* **16**, 264-277 (2015).
- 827 69. Farrell, J.S., *et al.* In vivo assessment of mechanisms underlying the neurovascular basis  
828 of postictal amnesia. *Sci Rep* **10**, 14992 (2020).
- 829 70. Heinbockel, T., *et al.* Endocannabinoid signaling dynamics probed with optical tools. *J*  
830 *Neurosci* **25**, 9449-9459 (2005).
- 831 71. Ju, N., *et al.* Spatiotemporal functional organization of excitatory synaptic inputs onto  
832 macaque V1 neurons. *Nat Commun* **11**, 697 (2020).
- 833 72. Sethuramanujam, S., *et al.* Rapid 'multi-directed' cholinergic transmission at central  
834 synapses. 2020.2004.2018.048330 (2020).
- 835 73. Kaifosh, P., Lovett-Barron, M., Turi, G.F., Reardon, T.R. & Losonczy, A. Septo-hippocampal  
836 GABAergic signaling across multiple modalities in awake mice. *Nat Neurosci* **16**, 1182-1184  
837 (2013).
- 838 74. Lovett-Barron, M., *et al.* Dendritic inhibition in the hippocampus supports fear learning.  
839 *Science* **343**, 857-863 (2014).
- 840 75. Farrell, J.S., *et al.* Postictal behavioural impairments are due to a severe prolonged  
841 hypoperfusion/hypoxia event that is COX-2 dependent. *Elife* **5**(2016).
- 842 76. Kaifosh, P., Zaremba, J.D., Danielson, N.B. & Losonczy, A. SIMA: Python software for  
843 analysis of dynamic fluorescence imaging data. *Front Neuroinform* **8**, 80 (2014).
- 844

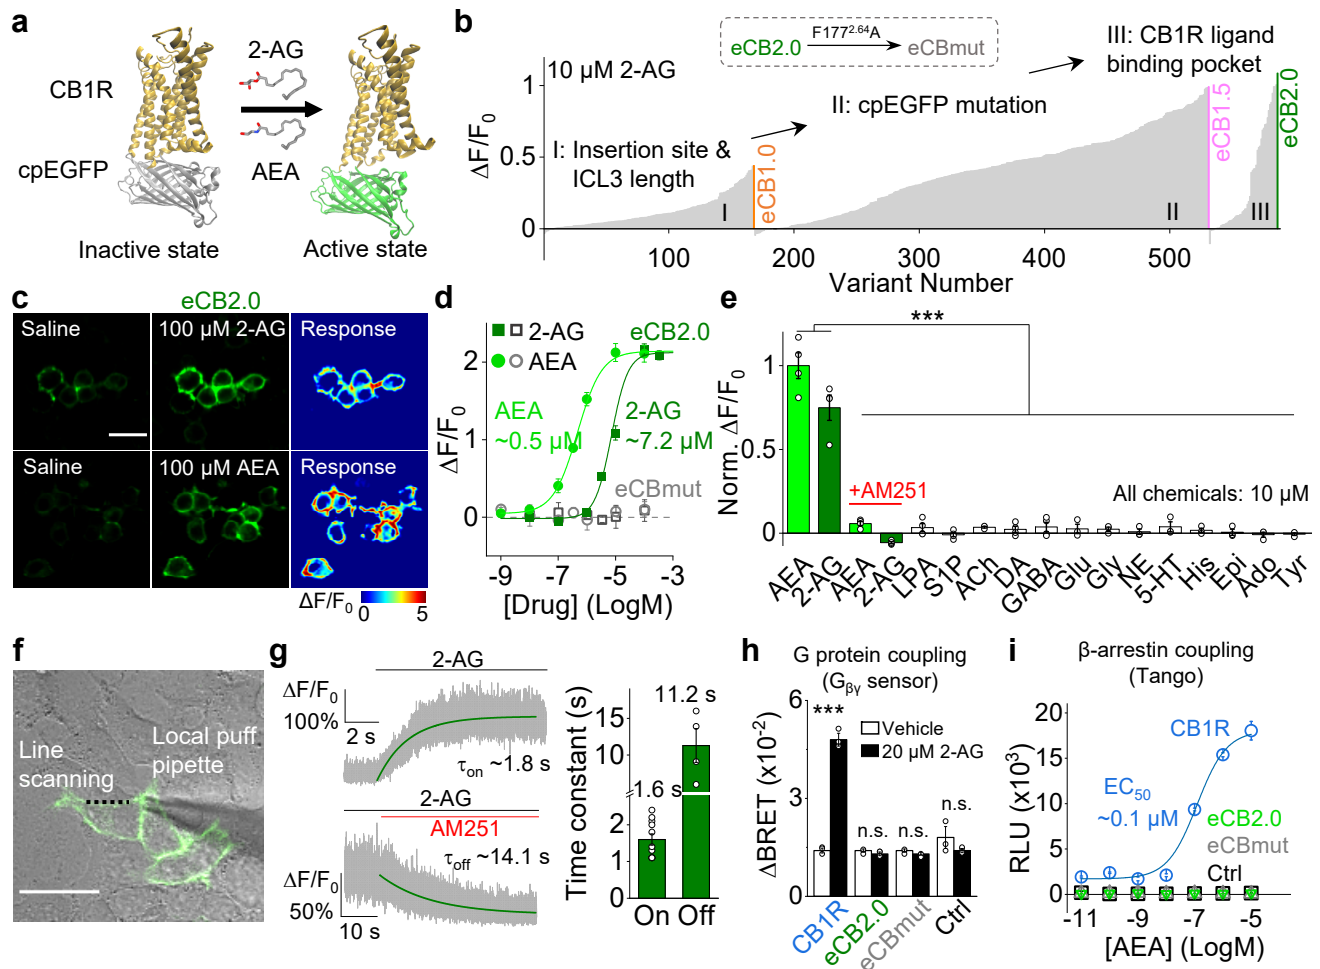

**Fig. 1 | Development and characterization of GRAB<sub>eCB</sub> sensors in HEK293T cells**

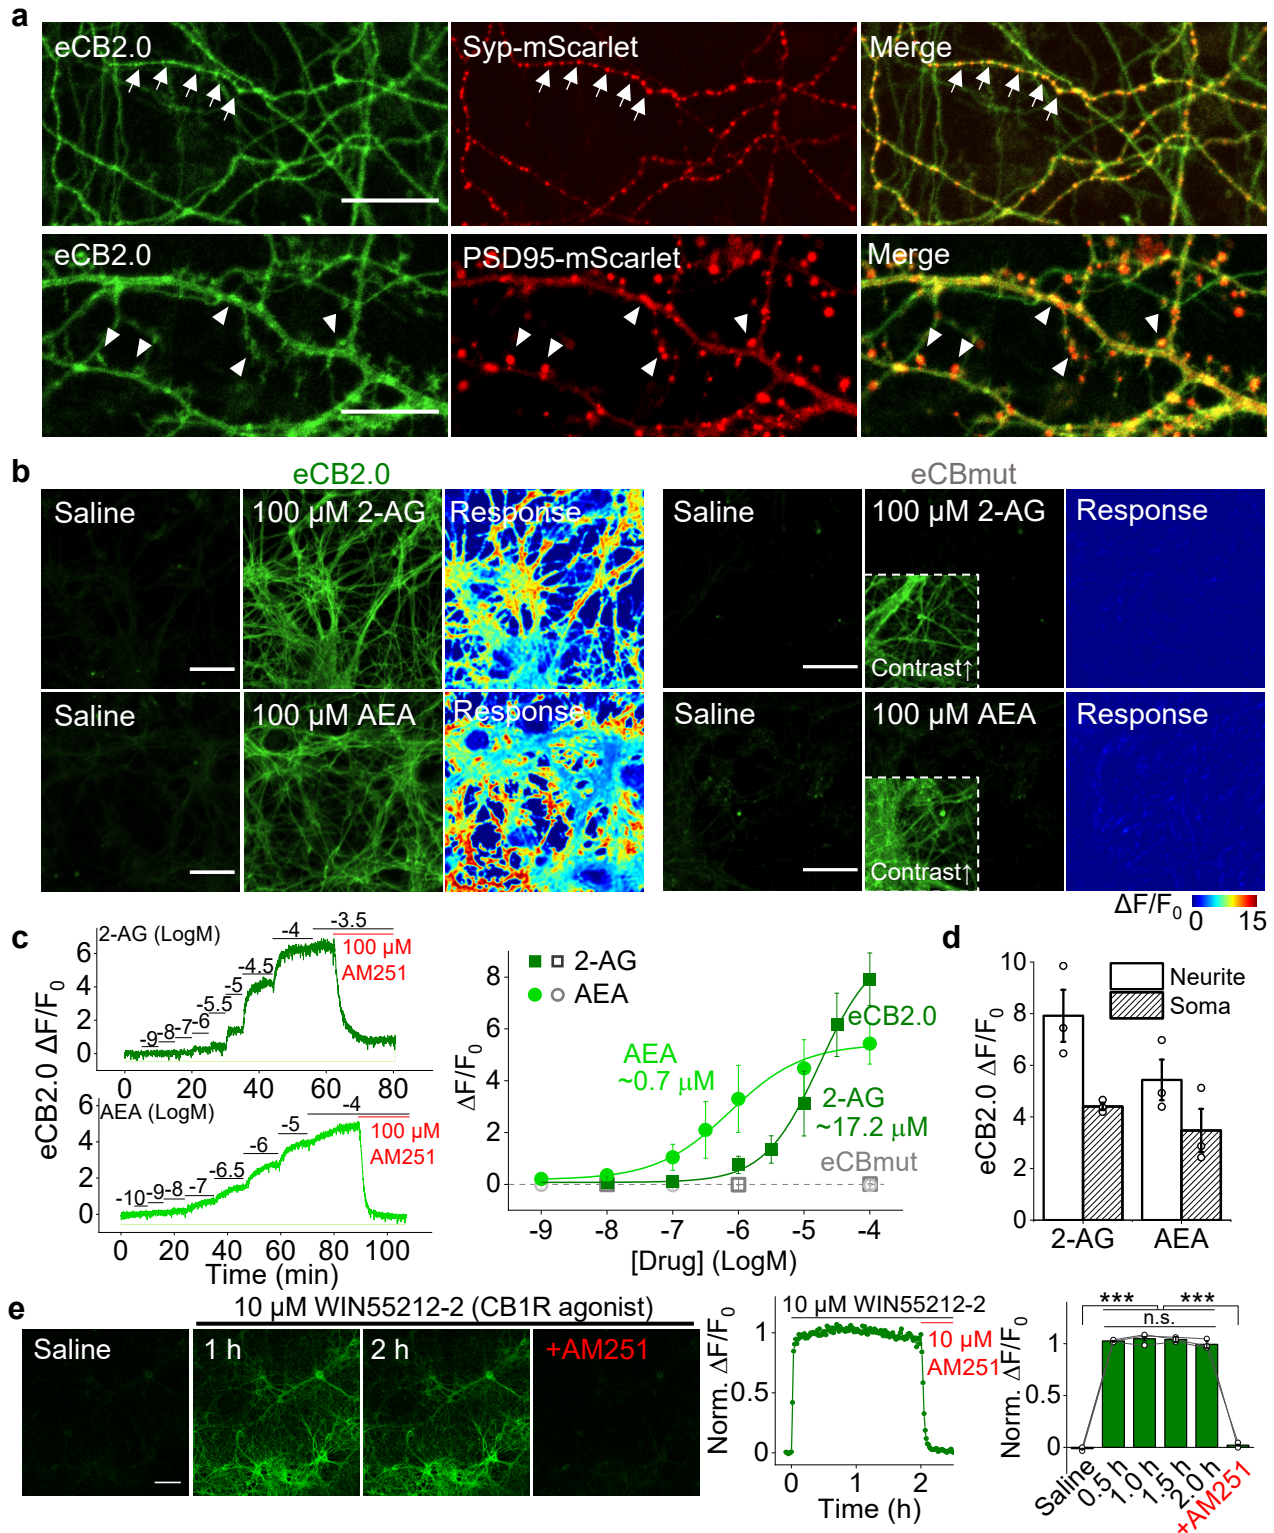

**Fig. 2 | Characterization of GRAB<sub>eCB</sub> in primary cultured neurons**

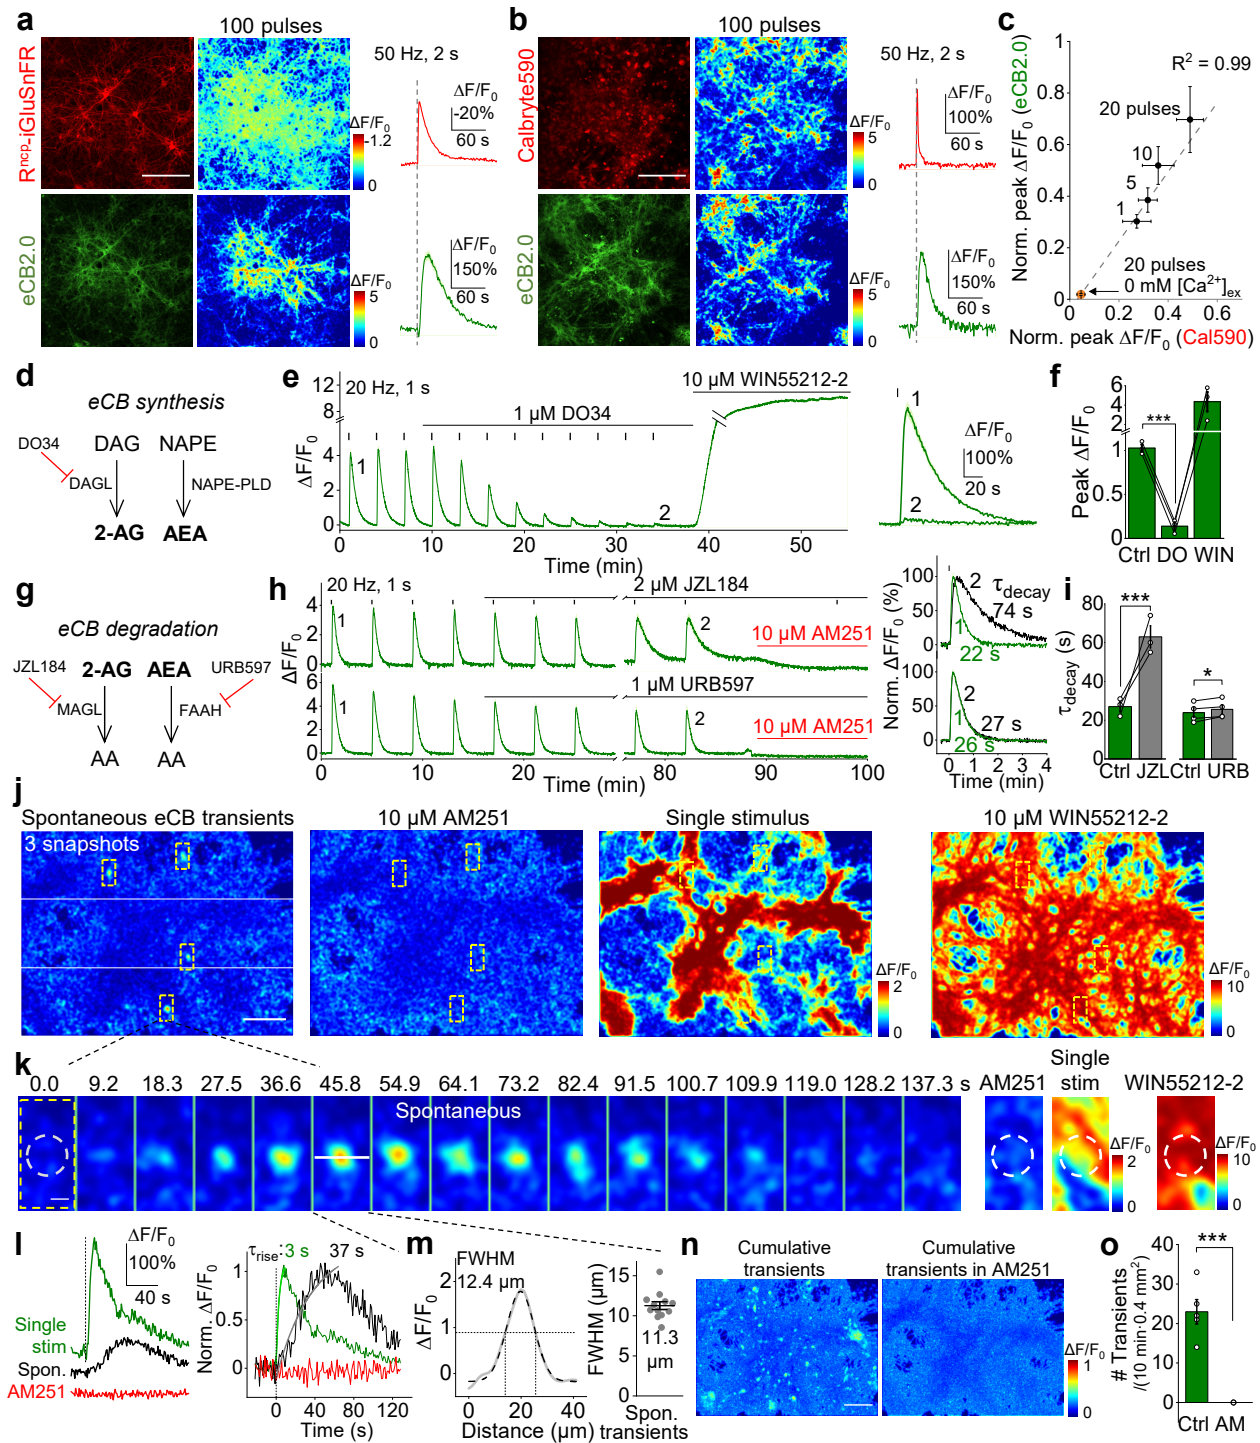

**Fig. 3 | Imaging endogenously released eCBs in primary cultured neurons**

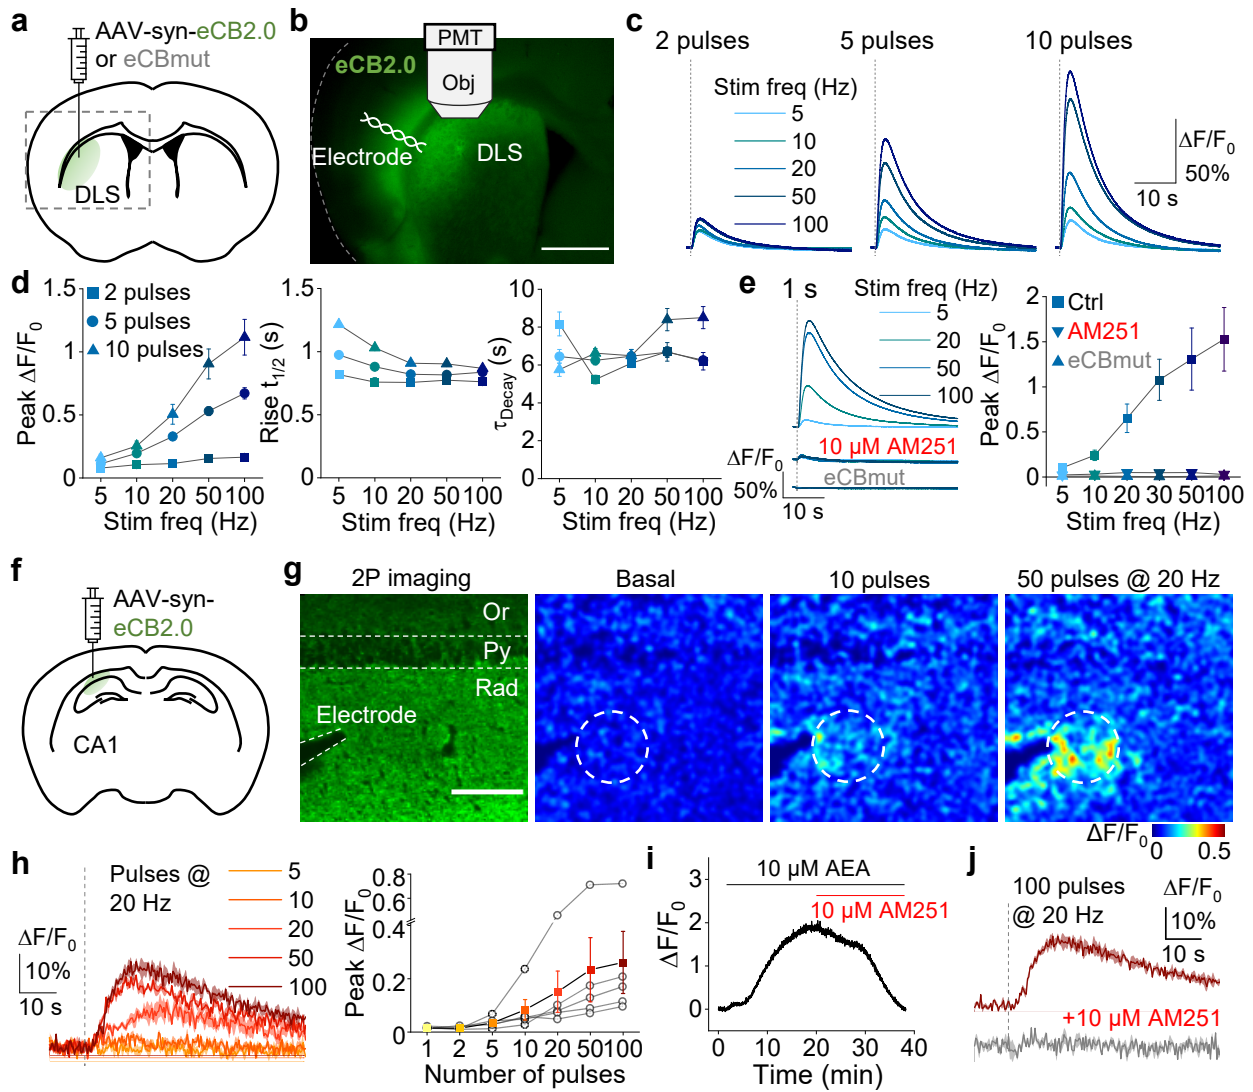

**Fig. 4 | Detection of eCBs in acute brain slices**



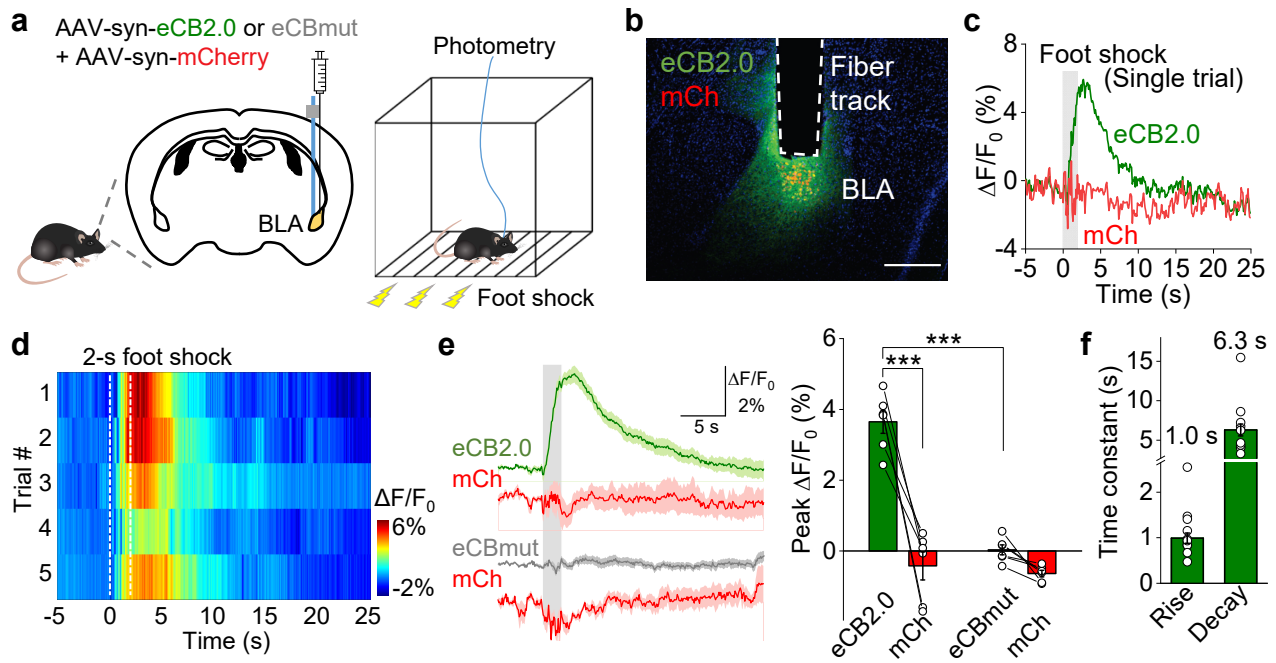

**Fig. 5 | Detection of foot shock-evoked eCB signals in the mouse basolateral amygdala**

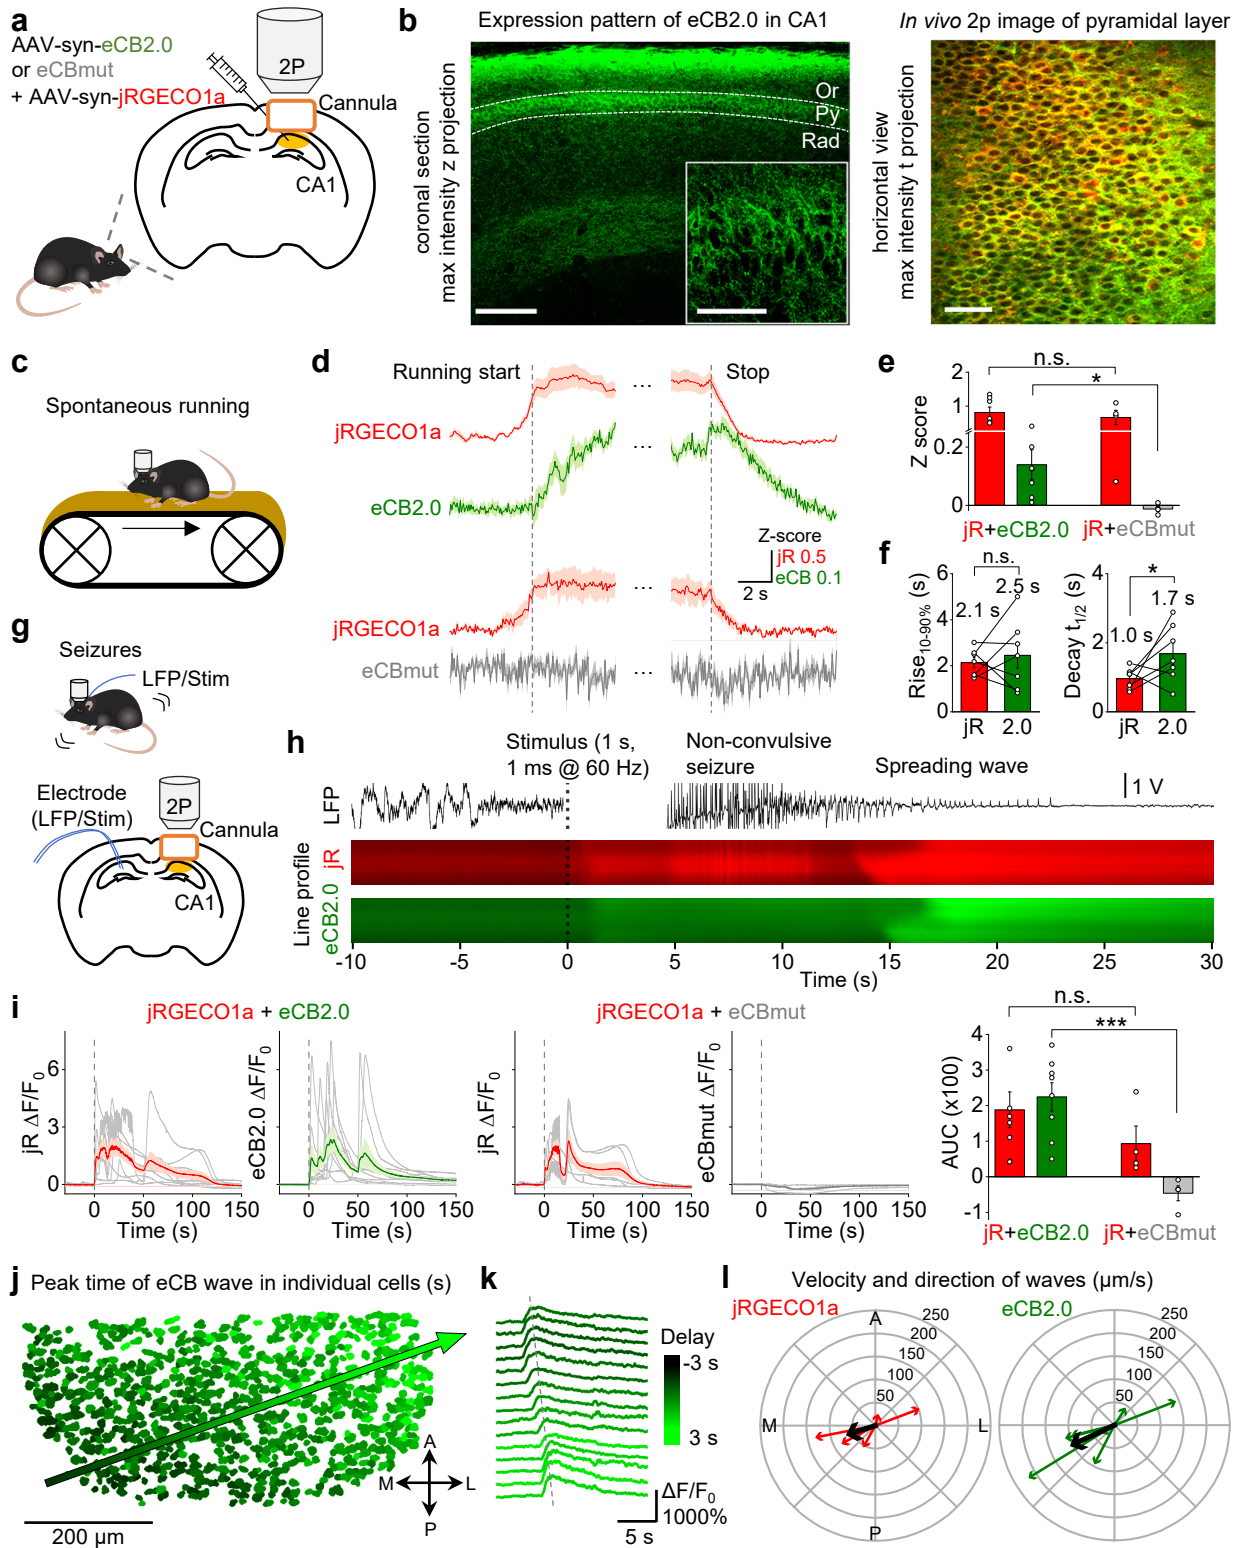

**Fig. 6 | Imaging eCB dynamics in mouse hippocampus during running and seizure**

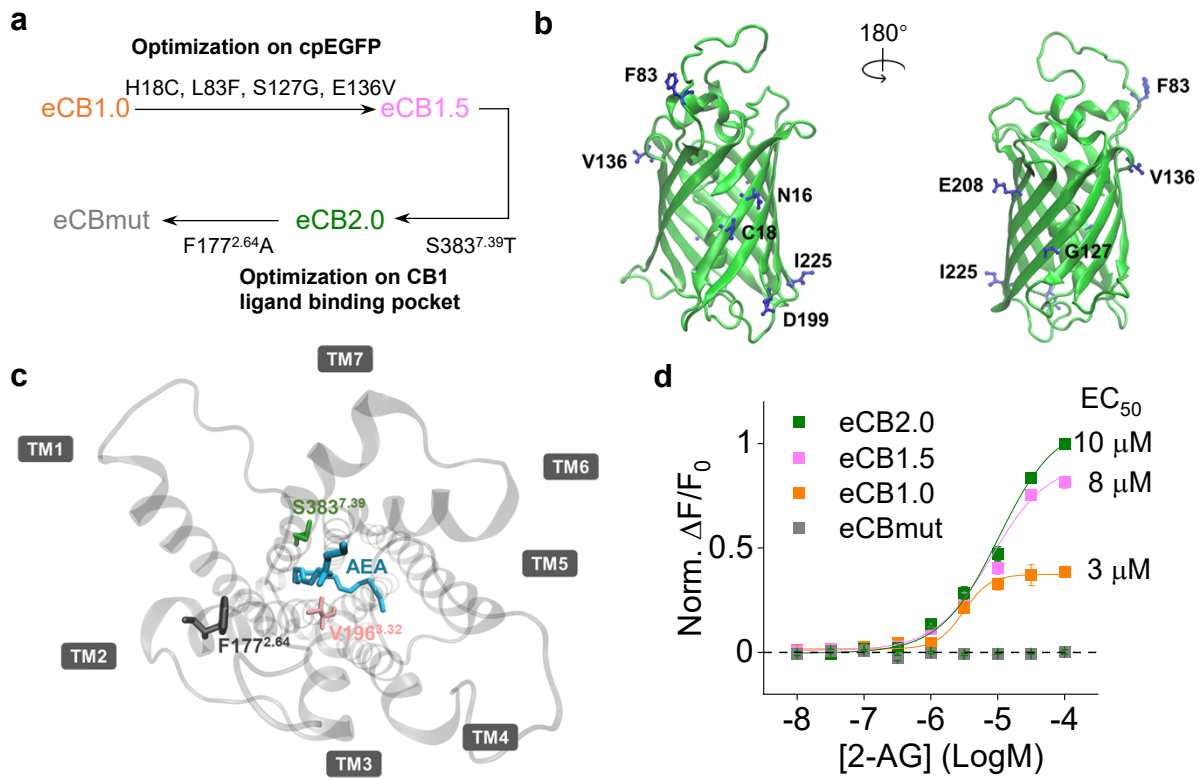

Extended Data Fig. 1 | Evolution of GRAB<sub>eCB</sub> sensors during the screening

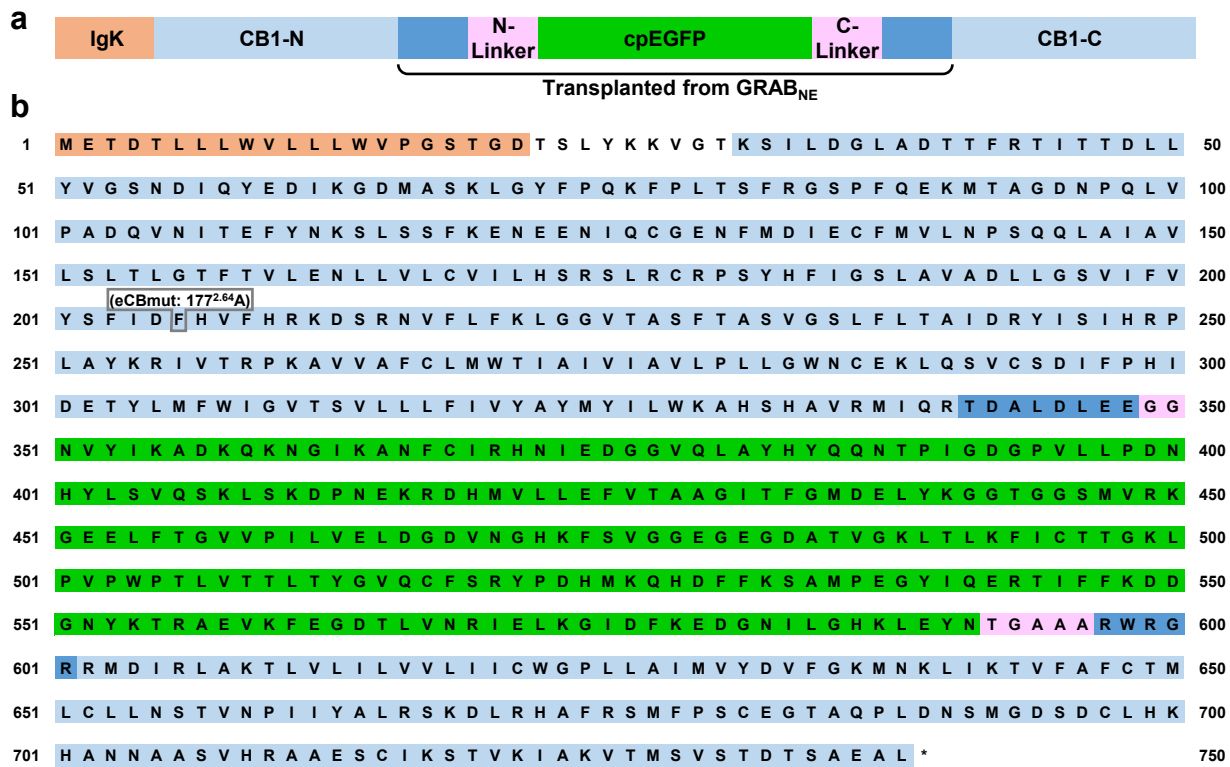

Extended Data Fig. 2 | Full amino acid sequences of eCB2.0 and eCBmut

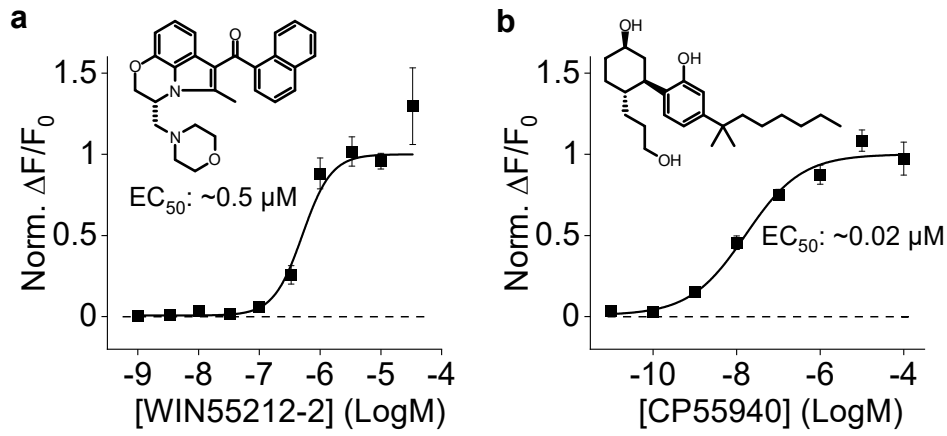

**Extended Data Fig. 3 | eCB2.0 responses to synthetic CB1R agonists**

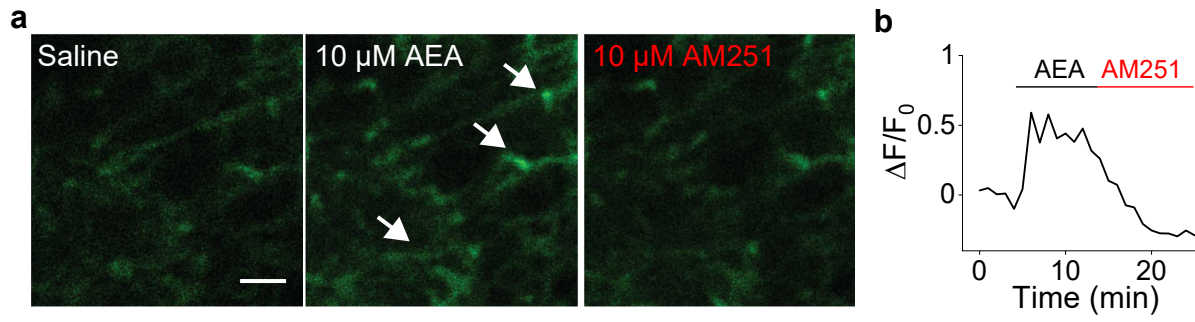

**Extended Data Fig. 4 | 2P imaging of eCB2.0 in acute mouse striatal slices**

845 **FIGURE LEGENDS**

846

847 **Fig. 1 | Development and characterization of GRAB<sub>eCB</sub> sensors in HEK293T cells**

848 **a**, Schematic diagrams depicting the design and principle of the GRAB<sub>eCB</sub> sensor.

849 **b**, Screening steps of GRAB<sub>eCB</sub> sensors and fluorescence responses to 10  $\mu$ M 2-AG of  
850 GRAB<sub>eCB</sub> candidates in HEK293T cells. eCBmut was generated by introducing F177<sup>2.64A</sup>  
851 to eCB2.0.

852 **c**, Expression and fluorescence response to 100  $\mu$ M 2-AG and AEA of eCB2.0 in HEK293T  
853 cells.

854 **d**, Dosage dependent responses of eCB2.0 to 2-AG and AEA in HEK293T cells. EC<sub>50</sub>s of  
855 2-AG and AEA were labelled. n = 3 wells.

856 **e**, Responses of eCB2.0 to eCBs and varied neurotransmitters and neuromodulators. Note  
857 the responses to eCBs were blocked by CB1R inverse agonist AM251. LPA,  
858 lysophosphatidic acid; S1P, sphingosine-1-phosphate; ACh, acetylcholine; DA, dopamine;  
859 GABA, gamma-aminobutyric acid; Glu, glutamate; Gly, glycine; NE, norepinephrine; 5-HT,  
860 5-hydroxytryptamine; His, histamine; Epi, epinephrine; Ado, adenosine; Tyr, tyramine. n =  
861 3-4 wells.

862 **f**, Illustration of a local puff system with a glass pipette filled with 100  $\mu$ M 2-AG or AM251  
863 placed close to an eCB2.0-expressing cell. Black dash line indicates the scanning region  
864 of interest.

865 **g**, Line scanning fluorescence responses (left) and summary of on/off time constants (right)  
866 of eCB2.0 to 2-AG or AM251. n = 11 (or 4) cells for rise (or decay) kinetics measurement.

867 **h**, G protein coupling of CB1R and GRAB<sub>eCB</sub> sensors measured using a BRET G <sub>$\beta$</sub>  <sub>$\gamma$</sub>  sensor.  
868 n = 3 repeats.

869 **i**,  $\beta$ -arrestin coupling of CB1R and GRAB<sub>eCB</sub> sensors measured using the Tango assay. n  
870 = 3 wells.

871 Values with error bars indicate mean  $\pm$  SEM. Student's t test performed; \*\*\*p < 0.001. Scale  
872 bar in (c) and (h), 30  $\mu$ m.

873

874 **Fig. 2 | Characterization of GRAB<sub>eCB</sub> in primary cultured neurons**

875 **a**, Localization of eCB2.0 in primary cultured rat cortical neurons. eCB2.0 displayed well in  
876 neuronal membrane of axons (indicated by arrow-labelled synaptophysin-mScarlet),  
877 dendrites and spines (indicated by arrowhead-labelled psd95-mScarlet).

878 **b**, Expression and fluorescence response to 100  $\mu$ M 2-AG and AEA of eCB2.0 and eCBmut.  
879 Insets on eCBmut images are contrast-enhanced to indicate the expression of the sensor.

880 **c**, Dose dependent responses of eCB2.0 and eCBmut in neurites to 2-AG and AEA. n = 3  
881 cultures.

882 **d**, Quantification of eCB2.0 responses to 100  $\mu$ M 2-AG and AEA in neuronal somata and  
883 neurites. n = 3 cultures.

884 **e**, Images, trace and quantification of eCB2.0 fluorescence to long-term WIN55212-2  
885 application in neurons. n = 3 cultures.

886 Values with error bars indicate mean  $\pm$  SEM. Student's t test and one-way ANOVA test  
887 performed; \*\*\*p < 0.001. Scale bar in (a), 30  $\mu$ m (upper) and 15  $\mu$ m (lower); in (b), 30  $\mu$ m;  
888 in (e), 100  $\mu$ m.

889



890 **Fig. 3 | Imaging endogenously released eCBs in primary cultured neurons**  
891 **a**, Expression of R<sup>ncp</sup>-iGluSnFR and eCB2.0 in neurons, pseudocolor images, and  
892 fluorescence traces showing the responses of R-iGluSnFR and eCB2.0 to 100 electrical  
893 pulses. 100 white circles (12.4  $\mu$ m in diameter) indicate ROIs for quantification.  
894 **b**, Loading of Calbryte590 and expression of eCB2.0 in neurons, pseudocolor images, and  
895 fluorescence traces showing the responses of Calbryte590 and eCB2.0 to 100 electrical  
896 pulses. 100 white circles (12.4  $\mu$ m in diameter) indicate ROIs for quantification.  
897 **c**, Relationship between peak Calbryte590 signals and peak eCB2.0 signals, evoked by 1,  
898 5, 10, 20 electrical pulses and 20 electrical pulses without extracellular Ca<sup>2+</sup>. Data were  
899 normalized to signals evoked by 200 electrical pulses at 50 Hz. n = 4 cultures.  
900 **d**, Diagram showing the eCB synthesis pathway and the pharmacological perturbation.  
901 **e**, Representative traces showing the eCB2.0 responses to 20 electrical pulses stimuli  
902 before (1) and after DO34 incubation (2), as well as the response to WIN55212-2.  
903 **f**, Quantification of peak eCB2.0 responses to 20 pulses stimuli before (Ctrl) and after 26  
904 min DO34 incubation (DO), as well as the response to WIN55212-2. n = 3 cultures.  
905 **g**, Diagram showing the eCB degradation pathway and the pharmacological perturbation.  
906 **h**, Representative traces showing the eCB2.0 responses to 20 electrical pulses stimuli  
907 before (1) and after JZL184 or URB597 incubation (2), as well as after the AM251  
908 incubation.  
909 **i**, Quantification of decay time constant before (Ctrl) and after 68 min JZL184 (or URB597)  
910 incubation (JZL or URB). n = 3 cultures.  
911 **j**, Pseudocolor images of spontaneous eCB transients, single pulse stimulus evoked eCB  
912 signals, and 10 $\mu$ M WIN55212-2 induced eCB2.0 signals.  
913 **k**, Pseudocolor images of a representative eCB transient event.  
914 **l**, Traces of the single pulse stimulus evoked eCB signal, spontaneous eCB transient and  
915 eCB2.0 signal in the presence of AM251 shown in **k**. Normalized traces with rise time  
916 constants are shown on the right.  
917 **m**, Spatial profile of the eCB transient shown in **l** (left). Quantification of eCB spontaneous  
918 transients FWHM is shown on the right. n = 12 eCB transients.  
919 **n**, Cumulative eCB transients during 19 min recording in the absence (left) or presence of  
920 AM251 (right). Pseudocolor images were calculated as maximum temporal projection  
921 subtracting average temporal projection over 19 min.  
922 **o**, Quantification of eCB transient frequency before (Ctrl) and after AM251 incubation (AM).  
923 n = 5 (Ctrl) or 3 (AM) x 10 min.  
924 Values with error bars indicate mean  $\pm$  SEM. Student's t test performed; \*p < 0.05, \*\*\*p <  
925 0.001. Scale bar in (a) and (b), 200  $\mu$ m; in (j) and (n), 100  $\mu$ m; in (k), 10  $\mu$ m.  
926

927 **Fig. 4 | Detection of eCBs in acute brain slices**

928 **a**, Schematic diagrams depicting the viral injection and expression in DLS. Acute slices are  
929 prepared for electrical stimulation and photometry recording. Dashed box corresponds to  
930 the image in b.

931 **b**, The expression of eCB2.0 in DLS and cartoons showing the electrical stimulation and  
932 photometry recording.

933 **c**, Representative traces showing eCB2.0 fluorescence ( $\Delta F/F_0$ ) increase evoked by  
934 electrical stimulation with different stimulation pulses and frequencies.

935 **d**, Quantification of peak responses, rise and decay kinetics of electrical stimulation-  
936 evoked eCB2.0 signals.  $n = 6$  slices.

937 **e**, Representative traces and quantification of peak responses showing eCB2.0  
938 fluorescence ( $\Delta F/F_0$ ) increase evoked by electrical stimulation in control group and in  
939 AM251 pre-incubated group.  $n = 3-4$  slices.

940 **f**, Schematic diagrams depicting the viral injection and expression in CA1, hippocampus.  
941 Acute slices were prepared for stimulation and 2 photon imaging.

942 **g**, Expression of eCB2.0 in CA1 and placement of the electrode, and pseudocolor images  
943 representing the electrical stimulation evoked eCB2.0 response.

944 **h**, Representative traces and quantification of peak responses showing eCB2.0  
945 fluorescence ( $\Delta F/F_0$ ) increase evoked by electrical stimulation with varied stimulation  
946 frequencies.  $n = 5$  slices.

947 **i**, eCB2.0 fluorescence signal ( $\Delta F/F_0$ ) when bath applying AEA and AM251.

948 **j**, Traces showing eCB2.0 fluorescence ( $\Delta F/F_0$ ) increase evoked by electrical stimulation  
949 before and after applying AM251.

950 Values with error bars indicate mean  $\pm$  SEM. Scale bar in (b), 1 mm; in (g), 100  $\mu\text{m}$ .

951

952 **Fig. 5 | Detection of foot shock-evoked eCB signals in the mouse basolateral**  
953 **amygdala**

954 **a**, Schematic diagrams depicting the viral expression, fiber photometry recording and  
955 behavior paradigm of the foot shock experiment.

956 **b**, Expression of eCB2.0 (green) and mCherry (red) in the BLA and placement of the  
957 recording; the nuclei were counterstained with DAPI (blue).

958 **c**, Representative single trial traces showing eCB2.0 and mCherry fluorescence ( $\Delta F/F_0$ )  
959 during an electrical foot shock.

960 **d**, Pseudocolor fluorescence responses of eCB2.0 to the foot shock. Five consecutive trials  
961 from one mouse were recorded and plotted relative to the onset of each stimulus.

962 **e**, Averaged traces showing eCB2.0 and mCherry (top) or eCBmut and mCherry (bottom)  
963 fluorescence during an electrical foot shock (left). Group summary of peak responses is  
964 shown on the right.  $n = 6$  mice.

965 **f**, Quantification of rise and decay kinetics of foot shock-evoked eCB2.0 signals.  $n = 21$  (or  
966 18) trials from 6 animals for rise (or decay) kinetics quantification.

967 Values with error bars indicate mean  $\pm$  SEM. Student's  $t$  test performed; \*\*\* $p < 0.001$ . Scale  
968 bar in (b), 300  $\mu\text{m}$ .

969

970 **Fig. 6 | Imaging eCB dynamics in mouse hippocampus during running and seizure**  
971 **a**, Schematic diagrams depicting the viral expression and cannula placement.  
972 **b**, Histology showing the expression of eCB2.0 in CA1 (left) and *in vivo* 2-photon image of  
973 pyramidal layer (right) showing the expression of eCB2.0 (green) and jRGECO1a (red).  
974 **c**, Schematic illustration of the experiment in which mice expressing eCB2.0 and  
975 jRGECO1a in CA1 are placed on a treadmill. The fluorescence is recorded using 2-photon  
976 microscope.  
977 **d**, Averaged traces of calcium and eCB transients recorded from somata of individual  
978 neurons in the pyramidal layer (left). Plots show the event-triggered average upon the start  
979 and stop of spontaneous running episodes (dashed lines).  
980 **e**, Group summary of peak responses in panel **d**.  $n = 8$  mice for eCB2.0 group and 4 mice  
981 for eCBmut group.  
982 **f**, Quantification data of rise and decay kinetics of jRGECO1a and eCB2.0 signals during  
983 running start and stop.  
984 **g**, Schematic illustration of the electrode placement and experiment in which mice  
985 expressing eCB2.0 and jRGECO1a in CA1 are recorded when inducing a kindling seizure.  
986 **h**, Example trace of LFP, with medio-lateral projections (line profile) of eCB2.0 and  
987 jRGECO1a fluorescence during electrically induced non-convulsive seizures and the  
988 following spreading wave. Dashed line indicates the stimulus onset.  
989 **i**, Individual and averaged traces of eCB2.0 (or eCBmut) and jRGECO1a fluorescence  
990 signals during the seizure. Dashed line indicates the stimulus onset. Group summary of  
991 AUC is shown on the right.  $n = 8$  mice for eCB2.0 group and 4 mice for eCBmut group.  
992 **j**, Spreading of eCB2.0 signal after a seizure. ROIs representing individual neurons are  
993 pseudo-colored according to the peak time of eCB2.0 signal relative to the peak time of  
994 the average signal (left). The symbols stand for (clockwise): anterior, lateral, posterior,  
995 medial.  
996 **k**, eCB2.0 traces of individual cells sampled systematically along a line fitted to the  
997 spreading wave (arrow). The dashed line shows the spreading of peak signals.  
998 **l**, Velocity and direction of the spreading eCB and calcium waves. Colored lines show  
999 individual sessions. Black lines show the average.  $n = 7$  sessions from 6 mice.  
1000 Values with error bars indicate mean  $\pm$  SEM. Student's t test performed; \* $p < 0.05$ , \*\*\* $p <$   
1001  $0.001$ , and n.s., not significant. Scale bar in (b, from left to right), 200, 50 and 50  $\mu\text{m}$ .  
1002

1003 **Extended Data Fig. 1 | Evolution of GRAB<sub>eCB</sub> sensors during the screening**

1004 **a**, Schematic representation of the evolution of GRAB<sub>eCB</sub> sensors.

1005 **b**, 8 sites selected for optimization on cpEGFP.

1006 **c**, 3 sites selected for optimization on the GPCR ligand binding pocket.

1007 **d**, Normalized dose-dependent responses of eCB1.0, eCB1.5, eCB2.0 and eCBmut to 2-  
1008 AG in HEK293T cells. n = 3 wells.

1009 Values with error bars indicate mean  $\pm$  SEM.

1010

1011 **Extended Data Fig. 2 | Full amino acid sequences of eCB2.0 and eCBmut**

1012 **a**, Schematic representation of the eCB2.0 structure.

1013 **b**, Amino acids sequence of the eCB2.0. 177<sup>2.64</sup> (labelled by the gray box) is mutated to A  
1014 in eCBmut.

1015

1016 **Extended Data Fig. 3 | eCB2.0 responses to synthetic CB1R agonists**

1017 **a**, Normalized dose-dependent responses of eCB2.0 to WIN55212-2.

1018 **b**, Normalized dose-dependent responses of eCB2.0 to CP55940.

1019

1020 **Extended Data Fig. 4 | 2P imaging of eCB2.0 in acute mouse striatal slices**

1021 **a**, 2P images of eCB2.0 (indicated by arrows) expressed in mouse striatum in saline, 10  
1022  $\mu$ M AEA and 10  $\mu$ M AM251.

1023 **b**, eCB2.0 fluorescence signal ( $\Delta F/F_0$ ) when bath applying AEA and AM251.

1024 Scale bar, 10  $\mu$ m.

1025

1026 **Extended Data Movie 1 | eCB and calcium signals in mouse hippocampal CA1 during  
1027 kindling seizure**

1028 2P imaging of eCB and calcium signals using eCB2.0 and jRGECO1a in mouse  
1029 hippocampal CA1 during kindling seizure. LFP was simultaneously recorded to indicate  
1030 the electrical stimulation and seizure.

1031 Scale bar, 50  $\mu$ m for images and 1 V for LFP.
